# Supplementary material for: Bayesian evaluation of diverging theories of episodic and affective memory distortions in dysphoria
Source: PubMed Central journal article supplement (PMC10864297; doi:10.1038/s41467-024-45203-4), 2024-02-13
Supplement: 41467_2024_45203_MOESM1_ESM.pdf [file 41467_2024_45203_MOESM1_ESM.pdf]

1 **SUPPLEMENTARY NOTE 1:**  
2 **SUMMARY OF THREE PILOT STUDIES OF THE ROAM**

3  
4 **Affective expression of autobiographical memories.** In order to validate and refine the  
5 ROAM in its capability to assess episodic memory detail and to track the psychophysiological  
6 expression of emotion during autobiographical memory retrieval, we conducted three pilot  
7 studies with  $N = 8$ ,  $N = 5$ , and  $N = 8$ . For the first pilot, we instructed participants to select five  
8 negative and five positive memories that could be important or trivial to them. While these  
9 instructions lead to some re-expression of emotionality assessed with fEMG, the responses to  
10 negative memories were not as strong as expected (according to visual inspection,  
11 **Supplementary Fig. 1a and b**). For the second pilot, we therefore asked participants to only  
12 select memories of events that were emotionally meaningful to them. Participants expressed  
13 strong physiological responses to negative memories consistent with our expectations  
14 (according to visual inspection, **Supplementary Fig. 1c and d**). For the final pilot, we added a  
15 neutral control condition. Further, we measured fEMG responses in two additional muscle  
16 regions (frontalis and depressor anguli oris<sup>112</sup>). A visual inspection of plots of the average time-  
17 course of each muscle per condition clearly showed that the frontalis and the depressor anguli  
18 oris did not distinguish better between negative, neutral, and positive memories than the  
19 corrugator and the zygomaticus (**Supplementary Fig. 2**). Therefore, frontalis and depressor  
20 anguli oris activity will not be further assessed in this study.

21 **Episodic detail of autobiographical memories.** In order to assess the episodic detail of  
22 each memory, we coded memories of the final pilot. We followed the coding instructions for  
23 autobiographical memories developed by Levine and colleagues<sup>33,62</sup>. However, we modified  
24 the codebook slightly by adding some examples and specific decision trees to increase inter-  
25 rater reliability and to adjust it to the ROAM. Specifically, two researchers coded the first three  
26 memories of each participant independently and we calculated the Intraclass Correlation  
27 Coefficient (ICC = 0.831) and Krippendorff's alpha ( $\alpha_K = 0.825$ ) for the number of episodic  
28 details coded per memory by each rater. Even though interrater reliability was already high,  
29 there were minor inconsistencies. These were discussed and addressed in a revised coding  
30 manual. Using the refined coding scheme, two raters coded the following five memories of  
31 each participant independently (ICC = 0.946,  $\alpha_K = 0.946$ ). Finally, two raters coded the last  
32 five memories of each participant (ICC = 0.937,  $\alpha_K = 0.936$ ). For all pilot statistics regarding  
33 episodic detail, we averaged the coding of the two independent raters.

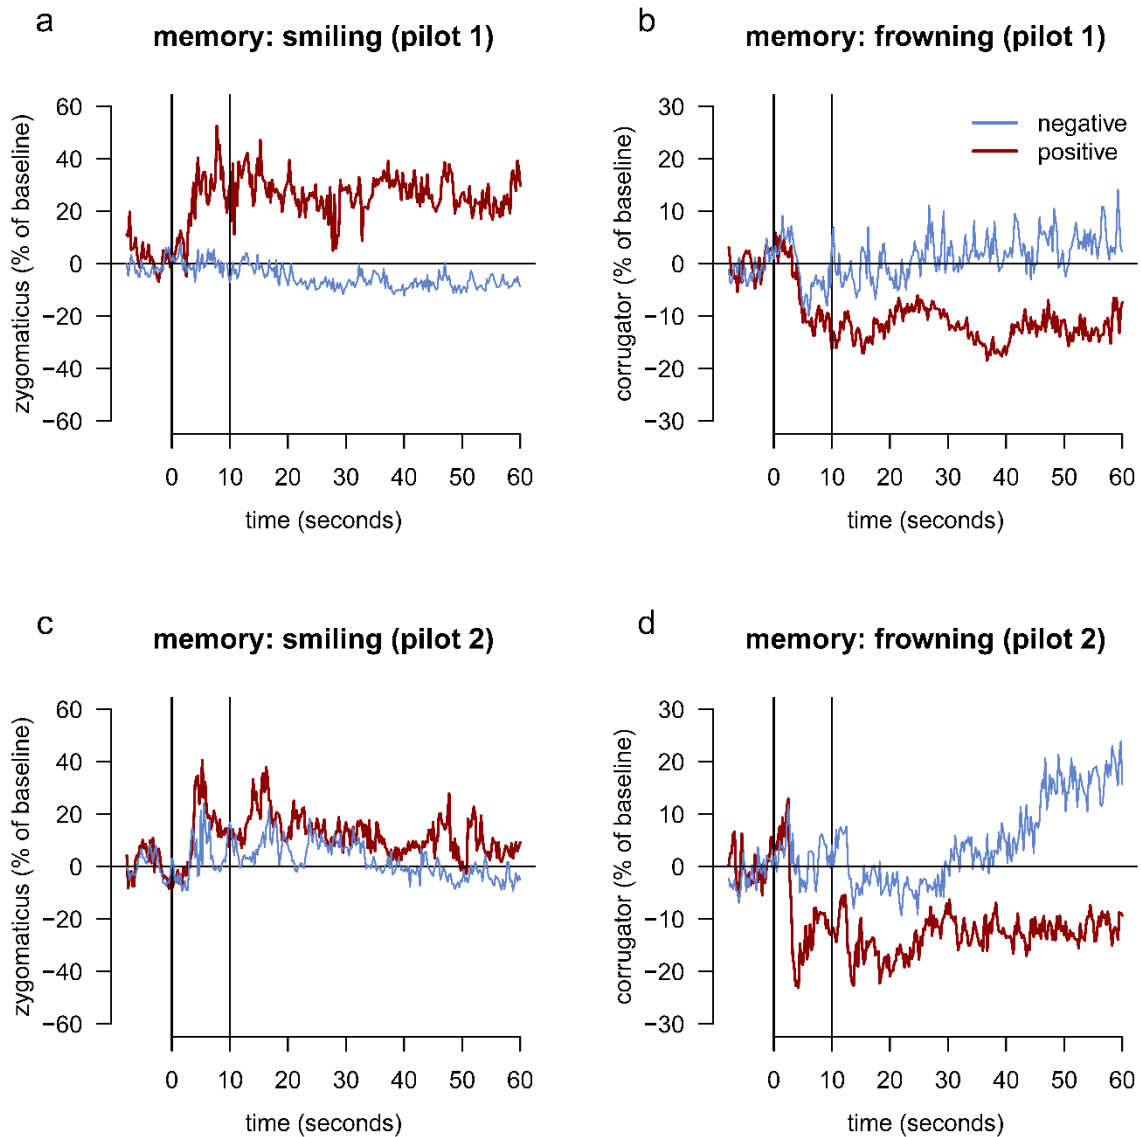

35

36 **Supplementary Fig. 1 The psychophysiological expression of affect in pilot 1 and pilot 2. a and b**  
 37 present zygomaticus and corrugator activity during the retrieval of positive and negative memories in  
 38 pilot 1 with  $N = 8$  participants. **c and d** present zygomaticus and corrugator activity in pilot 2 with  $N =$   
 39 5 participants. Muscle activity is presented as percentage change from baseline (4 s). The first vertical  
 40 line indicates the onset of the memory cues (0 s), the second vertical line indicates the offset of the  
 41 memory cues (10 s). For the remaining 50 seconds participants kept silently reliving the memory. In  
 42 contrast to pilot 3 and the registered report (with 1000ms segments), data of pilot 1 and 2 were down-  
 43 sampled to 250ms segments.

44

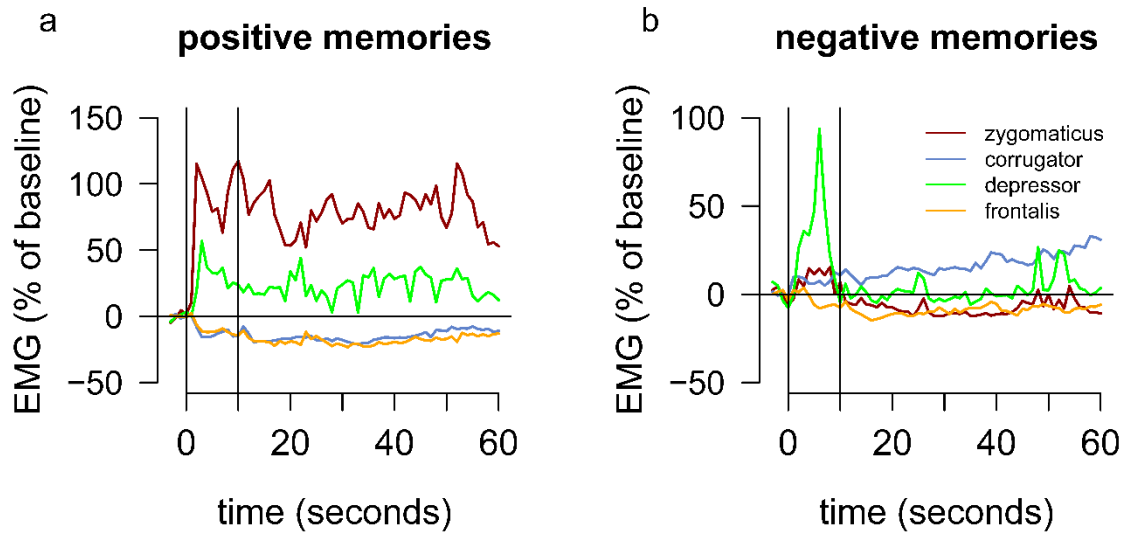

45  
 46 **Supplementary Fig. 2 Comparison of potential muscles to measure affective responses in the**  
 47 **ROAM (pilot 3 with  $N = 8$  participants).** **a** and **b** present muscle activity during the retrieval of  
 48 positive and negative autobiographical memories, respectively. Muscle activity is presented as  
 49 percentage change from baseline (4 s). The first vertical line indicates the onset of the memory cues (0  
 50 s), the second vertical line indicates the offset of the memory cues (10 s). For the remaining 50 seconds  
 51 participants kept silently reliving the memory.

52  
 53

54 **SUPPLEMENTARY NOTE 2:**  
55 **RESULTS OF THE FINAL PILOT STUDY OF THE ROAM**  
56

57 **Note:**

58 **This supplementary note was part of the Methods section of the in principle accepted**  
59 **Stage 1 Registered Report.**  
60

61 **Episodic detail of autobiographical memories.** Two raters independently coded the  
62 amount of internal episodic detail of each memory (for more detail, see **Methods: episodic**  
63 **detail – coding**). The interrater reliability of the coding of episodic detail was high (Intraclass  
64 Correlation Coefficient ICC = 0.937 and Krippendorff's alpha  $\alpha_K = 0.936$ , see **Supplementary**  
65 **Note 1** for more detail). We investigated descriptive statistics to evaluate whether the coded  
66 episodic detail would be suitable to investigate episodic detail in the ROAM. A multilevel  
67 model with a fixed effect for condition and a random intercept for participant showed that  
68 participants retrieved around twenty episodic details that were internal to the retrieved memory  
69 (estimated means negative:  $M = 20.863$ ,  $SE = 1.741$ , positive:  $M = 22.238$ ,  $SE = 1.741$ , neutral:  
70  $M = 16.431$ ,  $SE = 1.781$ ). Further, we calculated the intraclass correlation (ICC) for episodic  
71 detail in a multilevel model in which episodic detail across all conditions is predicted by only  
72 a fixed intercept and a random intercept of participant. The intraclass correlation (ICC = .393)  
73 indicated that 39% of the variance of episodic detail results from between-participants variance  
74 and 61% results from within-participants variance. To conclude, our pilot data showed that  
75 episodic detail can be reliably coded by independent raters, and it captures inter- as well as  
76 intraindividual differences in how memories are retrieved.  
77

78 **Affective expression of autobiographical memories.** We tested whether corrugator and  
79 zygomaticus response magnitudes allow the assessment of affective responses to positive and  
80 negative autobiographical memories. fEMG data of the pilot are displayed in **Supplementary**  
81 **Fig. 3a and 3b**. It can be observed that responses were relatively consistent and did not  
82 habituate with time. We averaged the data for the entire 1-minute retrieval segment and  
83 performed our analyses on these segments. We evaluated evidence for the hypotheses that  
84 zygomaticus activity is higher during the recall of positive memories than during their  
85 preceding baseline (manipulation check 1.1 – H1,  $BF_{1c} = 422.414$ ,  $PostP_1 = .968$ ), that  
86 zygomaticus activity is lower during recall of positive memories than during baseline  
87 (manipulation check 1.1 – H2,  $BF_{H2c} = 0.002$ ,  $PostP_2 = .002$ ) and that zygomaticus activity is  
88 similar during recall of positive memories and baseline (manipulation check 1.1 – H0,  $BF_{0c} =$   
89  $0.060$ ,  $PostP_0 = .020$ ). The results provided strong evidence that the zygomaticus is more active

90 during the recall of positive memories than during baseline. To test whether this response is  
91 specific for positive memories, we evaluated evidence for the hypotheses that the baseline-  
92 corrected zygomaticus response is higher when remembering positive memories than when  
93 remembering neutral memories (manipulation check 1.2 – H1,  $BF_{1c} = 57.948$ ,  $PostP_1 = .825$ ),  
94 that the zygomaticus response is lower for positive memories than for neutral memories  
95 (manipulation check 1.2 – H2,  $BF_{2c} = 0.017$ ,  $PostP_2 = .014$ ), and that the zygomaticus response  
96 is similar for positive and neutral memories (manipulation check 1.2 – H0,  $BF_{0c} = 0.382$ ,  $PostP_0$   
97  $= .161$ ). These results provided strong evidence that participants smile more when reliving  
98 positive than when reliving neutral memories.

99 We evaluated evidence for the hypotheses that corrugator activity is higher during the  
100 recall of negative memories than during baseline (manipulation check 1.1 – H1,  $BF_{1c} = 44.911$ ,  
101  $PostP_1 = .842$ ), that corrugator activity is lower during recall of negative memories than during  
102 baseline (manipulation check 1.1 – H2,  $BF_{2c} = 0.022$ ,  $PostP_2 = .019$ ), and that corrugator  
103 activity is similar during the recall of negative memories and during baseline (manipulation  
104 check 1.1 – H0,  $BF_{0c} = 0.324$ ,  $PostP_0 = .139$ ). The results provided strong evidence that the  
105 corrugator is more active during the recall of negative memories than during baseline. To test  
106 whether this response is specific for negative memories, we evaluated evidence for the  
107 hypotheses that the baseline-corrected corrugator response is higher when remembering  
108 negative memories than when remembering neutral memories (manipulation check 1.2 – H1,  
109  $BF_{1c} = 18.825$ ,  $PostP_{11} = .680$ ), that the corrugator response is lower when remembering  
110 negative memories than when remembering neutral memories (manipulation check 1.2 – H2,  
111  $BF_{2c} = 0.053$ ,  $PostP_2 = .036$ ), and that the corrugator response is similar for negative and neutral  
112 memories (manipulation check 1.2 – H0,  $BF_{0c} = 0.792$ ,  $PostP_0 = .284$ ). These results provided  
113 evidence that participants frowned more when reliving negative than when reliving neutral  
114 memories.

115 In sum, the findings regarding zygomaticus and corrugator activity during memory  
116 retrieval provided compelling evidence that the ROAM allows to measure the  
117 psychophysiological expression of affect during autobiographical memory retrieval.

118

119 **Relationship between episodic detail and affective response.** We tested whether  
120 within-participant variations in episodic detail (i.e. participant-centred episodic detail) predicts  
121 affective responses to memories. For positive memories, we compared evidence for a positive  
122 relationship between episodic detail and zygomaticus responses (H1:  $\gamma > 0$ ,  $BF_{1c} = 18.209$ ,  
123  $PostP_1 = .700$ ), for a negative relationship (H2:  $\gamma < 0$ ,  $BF_{2c} = .055$ ,  $PostP_2 = .028$ ), and for no

124 relationship ( $H_0: \gamma = 0$ ,  $BF_{0c} = 0.707$ ,  $PostP_0 = .261$ ). For negative memories, we compared  
 125 evidence for a positive relationship between episodic detail and corrugator responses ( $H_1: \gamma >$   
 126  $0$ ,  $BF_{1c} = 0.604$ ,  $PostP_1 = .168$ ), for a negative relationship ( $H_2: \gamma < 0$ ,  $BF_{2c} = 1.657$ ,  $PostP_2 =$   
 127  $0.279$ ), and for no relationship ( $H_0: \gamma = 0$ ,  $BF_{0c} = 2.476$ ,  $PostP_0 = .553$ ). The results indicate  
 128 that more episodic detail is associated with stronger affective responses to positive but not  
 129 negative memories. Even though this finding was based on few data points from the pilot and  
 130 needs to be interpreted with caution, it provided preliminary evidence that the ROAM allows  
 131 to investigate the relationship between episodic detail of autobiographical memories and the  
 132 psychophysiological expression of affective responses. However, it is important to note that in  
 133 contrast to the pilot, results from the registered report provided evidence against a relationship  
 134 of episodic detail and affective responses.

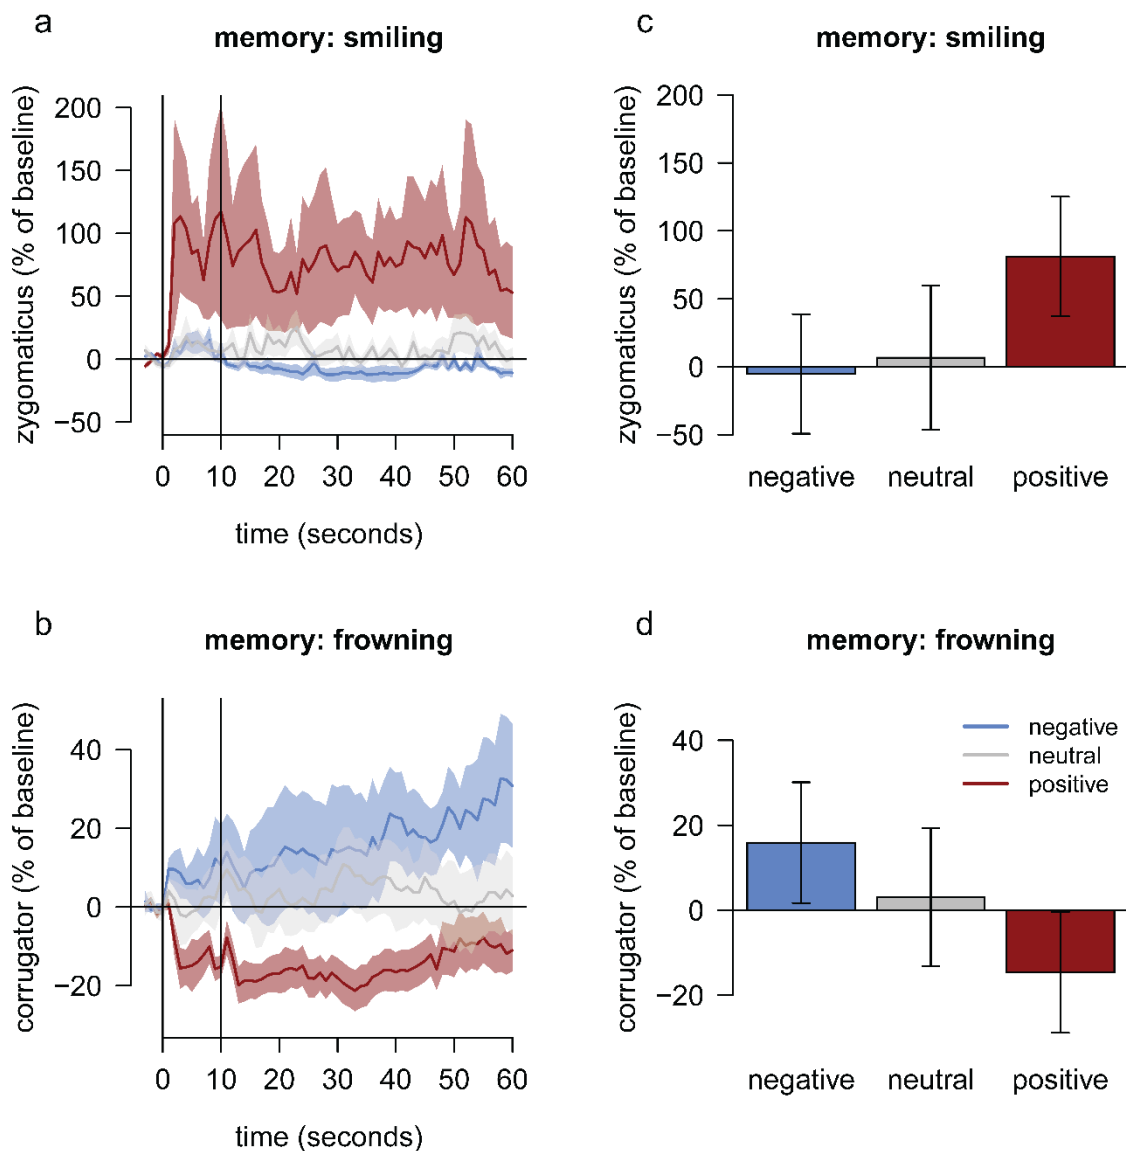

135  
 136 **Supplementary Fig. 3 Zygomaticus and corrugator activity during autobiographical memory**

137 **recall in the ROAM in the final pilot ( $N = 8$  participants).** **a** and **b** present zygomaticus and  
138 corrugator activity over time for the positive, negative, and neutral condition, respectively. Muscle  
139 activity is presented as percentage change from baseline (4s). The first vertical line indicates the onset  
140 of the memory cues (0 s), the second vertical line indicates the offset of the memory cues (10 s). For  
141 the remaining 50 seconds participants kept silently reliving the memory. The error bands represent the  
142 standard error of the mean. The data was averaged across memories within each participant before  
143 calculating the average and standard error for each time point across participants. **c** and **d** represent  
144 the estimated average of the zygomaticus and corrugator responses during the recall phase (60 s). The  
145 error bars represent credible intervals<sup>95</sup>.

146

147 **Affective expression while watching emotional movie clips.** We investigated whether  
148 the experience of new positive and negative events (i.e. watching a movie clip) results in  
149 enhanced zygomaticus and corrugator activity, respectively (**Supplementary Fig. 4**). We  
150 evaluated evidence for the hypotheses that zygomaticus activity is higher while watching  
151 positive movie clips compared to neutral movie clips (zygomaticus check 3 – H1,  $BF_{1c} =$   
152  $1184.247$ ,  $PostP_1 > .988$ ), that zygomaticus activity is smaller while watching positive movie  
153 clips compared to neutral clips (zygomaticus check 3 – H2,  $BF_{2c} < 0.001$ ,  $PostP_2 < .001$ ), and  
154 that zygomaticus activity is similar when watching positive movie clips compared to neutral  
155 clips (zygomaticus check 3 – H0,  $BF_{0c} = 0.023$ ,  $PostP_0 = .011$ ). The results provide  
156 overwhelming evidence that the zygomaticus is more active when watching positive movies  
157 than when watching neutral movies. Further, we evaluated evidence for the hypotheses that  
158 corrugator activity is higher while watching negative movie clips compared to neutral movie  
159 clips (corrugator check 3 – H1,  $BF_{1c} = 41.286$ ,  $PostP_1 = .797$ ), that corrugator activity is  
160 smaller while watching negative movie clips compared to neutral clips (corrugator check 3 –  
161 H2,  $BF_{2c} = 0.024$ ,  $PostP_2 = .019$ ), and that corrugator activity is similar when watching  
162 negative movie clips compared to neutral clips (corrugator check 3 – H0,  $BF_{0c} = 0.450$ ,  
163  $PostP_0 = .184$ ). The results provide strong evidence that the corrugator is more active when  
164 watching negative movies than when watching neutral movies.

165

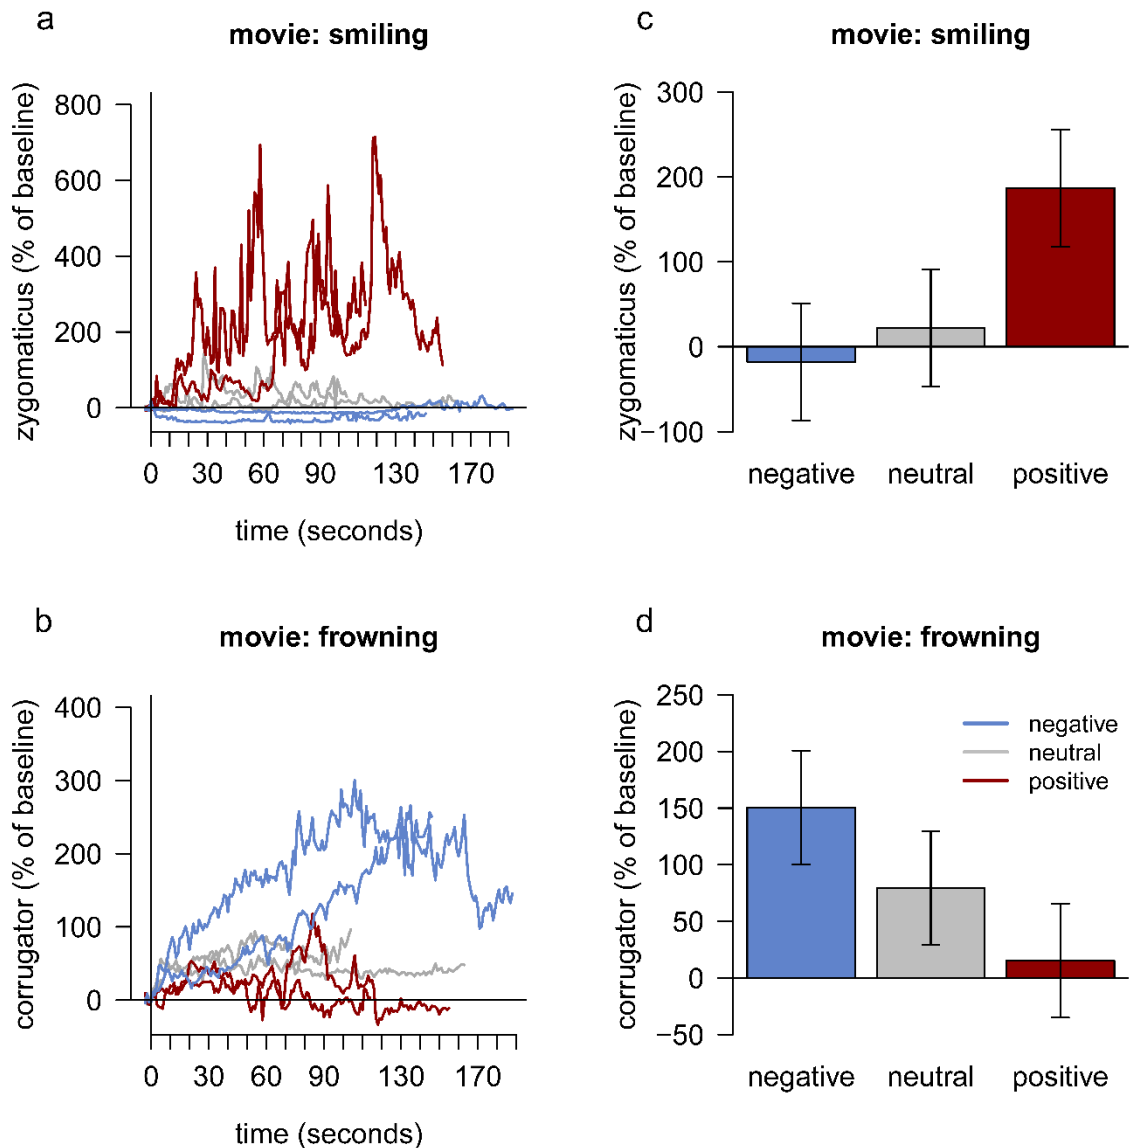

166  
 167 **Supplementary Fig. 4 Zygomaticus and corrugator activity while watching movie clips.** **a** and **b**  
 168 present zygomaticus and corrugator activity over time for movies in the positive, negative, and neutral  
 169 condition, respectively. Muscle activity is presented as percentage change from baseline (4s). Since the  
 170 movies have slightly different durations, data was not averaged across movies. Instead, the average  
 171 timeline across participants is plotted for each movie clip, i.e. two movies per emotion condition. **c** and  
 172 **d** represent the estimated average (derived from multilevel modelling) of the zygomaticus and  
 173 corrugator activity while watching movie clips (60 s). The error bars represent credible intervals<sup>96</sup>. The  
 174 figure represents data from N = 8 participants.

175



**SUPPLEMENTARY NOTE 3:  
PILOT SENSITIVITY ANALYSES**

**Supplementary table 1. Zygomaticus – Manipulation check 1.1.**

Do participants without dysphoria smile when remembering positive memories?

|     | Fraction = 1     |                    | Fraction = 2     |                    | Fraction = 3     |                    |
|-----|------------------|--------------------|------------------|--------------------|------------------|--------------------|
|     | BF <sub>ic</sub> | PostP <sub>i</sub> | BF <sub>ic</sub> | PostP <sub>i</sub> | BF <sub>ic</sub> | PostP <sub>i</sub> |
| H1: | 422.414          | .957               | 422.414          | .968               | 422.414          | .974               |
| H2: | 0.002            | .002               | 0.002            | .002               | 0.002            | .002               |
| H0: | 0.085            | .041               | 0.060            | .029               | 0.049            | .024               |

H1: Individuals without dysphoria smile more when reliving positive memories than during baseline.

H2: Individuals without dysphoria smile less when reliving positive memories than during baseline.

H0: Individuals without dysphoria smile equally when reliving positive memories and during baseline.

**Supplementary table 2. Zygomaticus – Manipulation check 1.2:**

Do participants without dysphoria smile more when remembering positive memories compared to neutral memories?

|     | Fraction = 1     |                    | Fraction = 2     |                    | Fraction = 3     |                    |
|-----|------------------|--------------------|------------------|--------------------|------------------|--------------------|
|     | BF <sub>ic</sub> | PostP <sub>i</sub> | BF <sub>ic</sub> | PostP <sub>i</sub> | BF <sub>ic</sub> | PostP <sub>i</sub> |
| H1: | 57.948           | .774               | 57.948           | .825               | 57.948           | .850               |
| H2: | 0.017            | .013               | 0.017            | .014               | 0.017            | .015               |
| H0: | 0.541            | .213               | 0.382            | .161               | 0.312            | .135               |

H1: Individuals without dysphoria smile more when reliving positive memories than when remembering neutral memories.

H2: Individuals without dysphoria smile less when reliving positive memories than when remembering neutral memories.

H0: Individuals without dysphoria smile equally when reliving positive memories and neutral memories.

203 **Supplementary table 3. Corrugator – Manipulation check 1.1:**

204 Do participants without dysphoria frown when remembering negative memories?

205

|     | Fraction = 1     |                    | Fraction = 2     |                    | Fraction = 3     |                    |
|-----|------------------|--------------------|------------------|--------------------|------------------|--------------------|
|     | BF <sub>ic</sub> | PostP <sub>i</sub> | BF <sub>ic</sub> | PostP <sub>i</sub> | BF <sub>ic</sub> | PostP <sub>i</sub> |
| H1: | 44.911           | .796               | 44.911           | .842               | 44.911           | .864               |
| H2: | 0.022            | .018               | 0.022            | .019               | 0.022            | .019               |
| H0: | 0.458            | .186               | 0.324            | .139               | 0.117            | .117               |

206

207 H1: Individuals without dysphoria frown more when reliving negative memories than during  
208 baseline.

209 H2: Individuals without dysphoria frown less when reliving negative memories than during  
210 baseline.

211 H0: Individuals without dysphoria frown equally when reliving negative memories and  
212 during baseline.

213

214 **Supplementary table 4. Corrugator – Manipulation check 1.2:**

215 Do participants without dysphoria frown more when remembering negative memories  
216 compared to neutral memories?

217

|     | Fraction = 1     |                    | Fraction = 2     |                    | Fraction = 3     |                    |
|-----|------------------|--------------------|------------------|--------------------|------------------|--------------------|
|     | BF <sub>ic</sub> | PostP <sub>i</sub> | BF <sub>ic</sub> | PostP <sub>i</sub> | BF <sub>ic</sub> | PostP <sub>i</sub> |
| H1: | 18.825           | .609               | 18.825           | 0.680              | 18.825           | 0.717              |
| H2: | 0.053            | .032               | 0.053            | 0.036              | 0.053            | 0.038              |
| H0: | 1.120            | .359               | 0.792            | 0.284              | 0.647            | 0.244              |

218

219 H1: Individuals without dysphoria frown more when reliving negative memories than when  
220 remembering neutral memories.

221 H2: Individuals without dysphoria frown less when reliving negative memories than when  
222 remembering neutral memories.

223 H0: Individuals without dysphoria frown equally when reliving negative memories and  
224 neutral memories.

225 **Supplementary table 5. Zygomaticus – Test 3.1A:**

226 Does the amount of retrieved episodic detail predict affective responses to a positive  
 227 autobiographical memory among individuals without dysphoria?

228

|     | Fraction = 1     |                    | Fraction = 2     |                    | Fraction = 3     |                    |
|-----|------------------|--------------------|------------------|--------------------|------------------|--------------------|
|     | BF <sub>ic</sub> | PostP <sub>i</sub> | BF <sub>ic</sub> | PostP <sub>i</sub> | BF <sub>ic</sub> | PostP <sub>i</sub> |
| H1: | 18.209           | .632               | 18.209           | .700               | 18.209           | .736               |
| H2: | 0.055            | .035               | 0.055            | .038               | 0.055            | .040               |
| H0: | 1.00             | .333               | 0.707            | .261               | 0.577            | .224               |

229

230 H1: Within individuals, more episodic detail during memory retrieval predicts stronger  
 231 affective responses to positive memories.

232 H2: Within individuals, more episodic detail during memory retrieval predicts weaker  
 233 affective responses to positive memories.

234 H0: Within individuals, episodic detail does not predict affective responses to positive  
 235 memories.

236

237 **Supplementary table 6. Corrugator – Test 3.1A:**

238 Does the amount of retrieved episodic detail predict affective responses to a negative  
 239 autobiographical memory among individuals without dysphoria?

240

|     | Fraction = 1     |                    | Fraction = 2     |                    | Fraction = 3     |                    |
|-----|------------------|--------------------|------------------|--------------------|------------------|--------------------|
|     | BF <sub>ic</sub> | PostP <sub>i</sub> | BF <sub>ic</sub> | PostP <sub>i</sub> | BF <sub>ic</sub> | PostP <sub>i</sub> |
| H1: | 0.604            | .137               | 0.604            | 0.168              | 0.604            | .187               |
| H2: | 1.657            | .227               | 1.657            | 0.279              | 1.657            | .310               |
| H0: | 3.502            | .636               | 2.476            | 0.553              | 2.022            | .503               |

241

242 H1: Within individuals, more episodic detail during memory retrieval predicts stronger  
 243 affective responses to negative memories.

244 H2: Within individuals, more episodic detail during memory retrieval predicts weaker  
 245 affective responses to negative memories.

246 H0: Within individuals, episodic detail does not predict affective responses to negative  
 247 memories.

248

249  
250  
251

### SUPPLEMENTARY NOTE 4: PARTICIPANT SCREENING AND INCLUSION

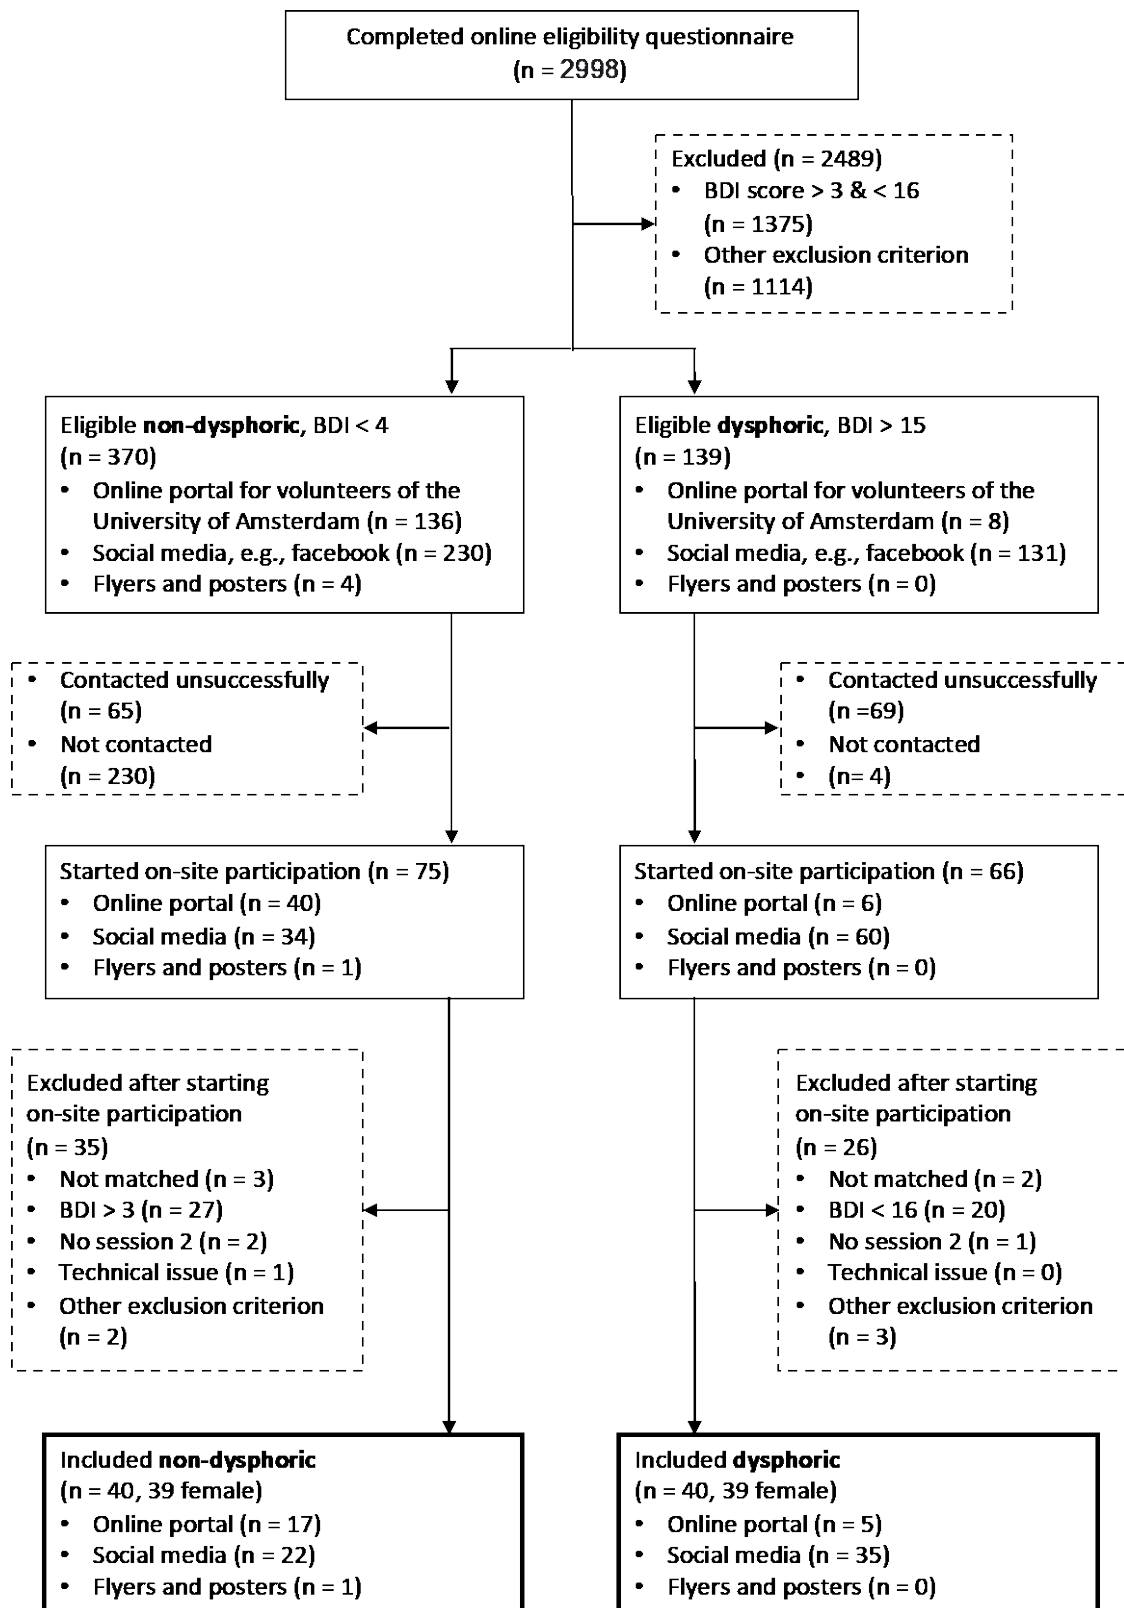

252  
253  
254  
255

Supplementary Fig. 5 Overview of the screening and inclusion of participants.

256  
257  
258

### SUPPLEMENTARY NOTE 5: BAYESIAN UPDATING

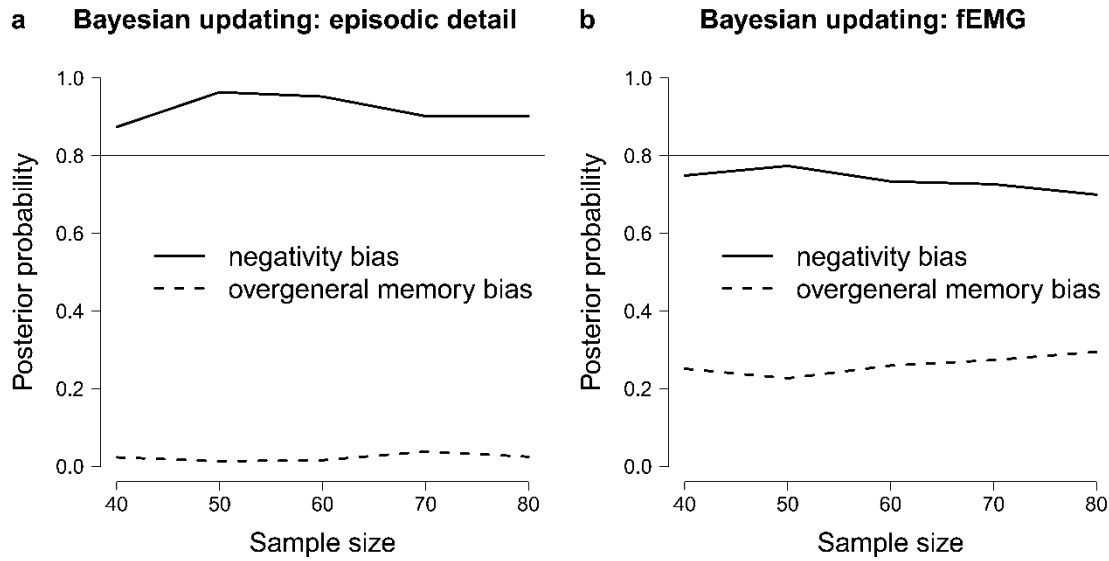

259

260 **Supplementary Fig. 6** Bayesian Updating. Evidence with increasing sample size from  $N = 40$  to  $N =$   
261 80 in steps of ten (five per group) for the preregistered analyses of episodic detail (a) and fEMG  
262 responses to memories (b). Evidence for the null and for the fail-safe hypothesis is not presented  
263 because they overlap and approach zero. The horizontal line at the posterior probability  $\text{PostP} = .8$   
264 indicates the stopping criterion.

265

266

267  
268  
269

### SUPPLEMENTARY NOTE 6: COMPLEMENTARY BOXPLOTS

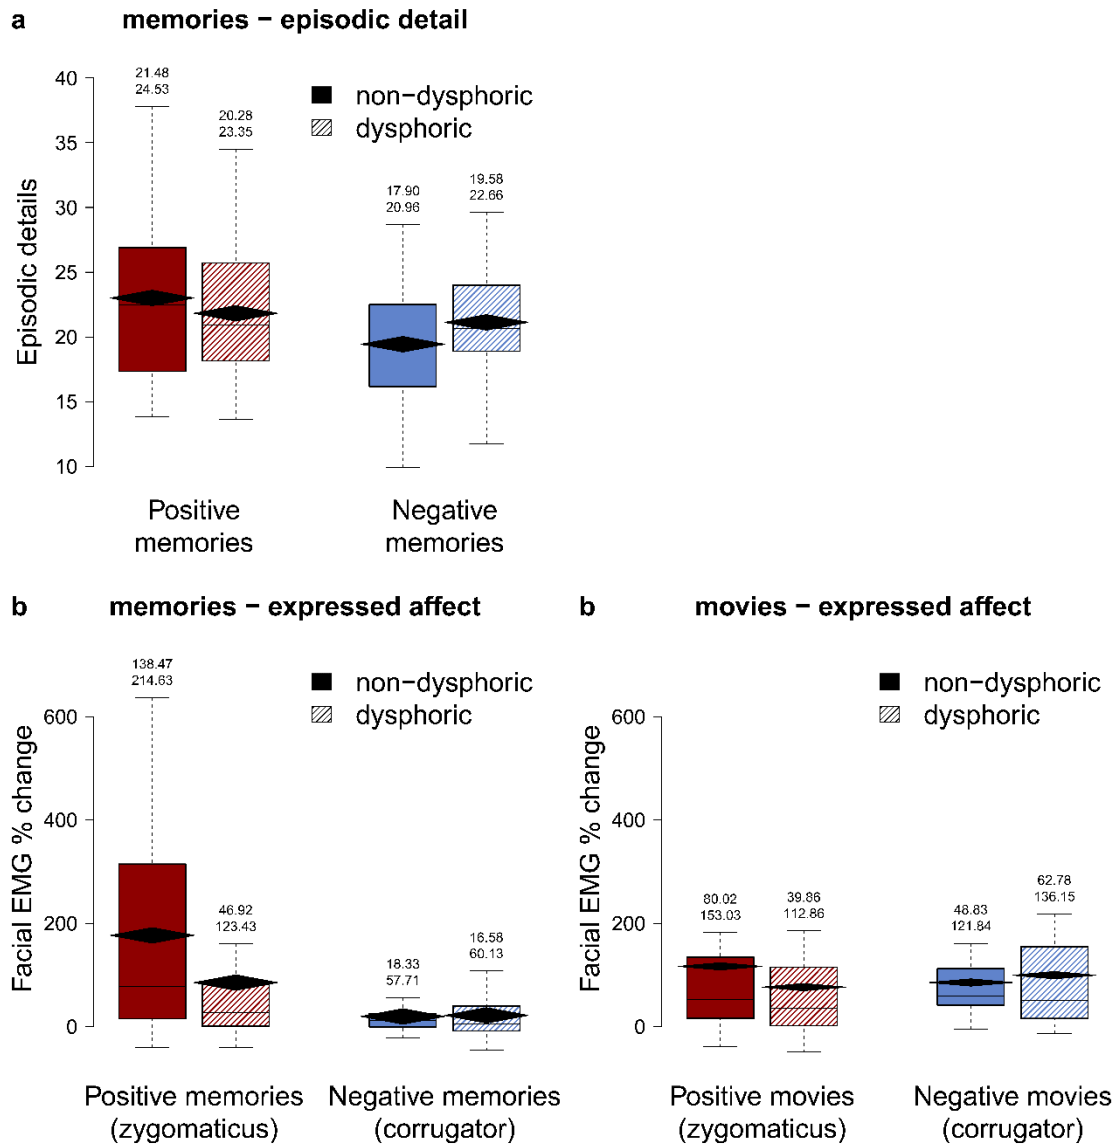

270

271

#### 272 **Supplementary Fig. 7 The Re-experience Of Autobiographical Memories (ROAM) in individuals**

273 **with and without dysphoria.** **a** depicts the number of retrieved episodic details when reliving  
274 emotional autobiographical memories. **b** and **c** depict the expressed affect while remembering  
275 emotional autobiographical memories and while watching emotional movie clips, respectively. For the  
276 boxplots, the data were first averaged across memories within condition and participant. The bounds of  
277 the boxes depict the interquartile range between the 25th and 75th percentile. The minima and maxima  
278 represent 1.5 times the interquartile range below and above the interquartile range, respectively. The  
279 horizontal bars indicate the median. The horizontal diamond shapes indicate the estimated means from  
280 the multilevel models used to evaluate the confirmatory hypotheses. The two numbers above each box  
281 represent the lower and upper bound of the Bayesian credible interval. The figure presents data from  
282 779 memories (a), 781 memories (b), and 319 movie clips (c) of  $n = 40$  participants with and  $n = 40$

283 participants without dysphoria. Red elements refer to positive memories or movies, blue elements refer  
284 to negative memories or movies.

285  
286  
287

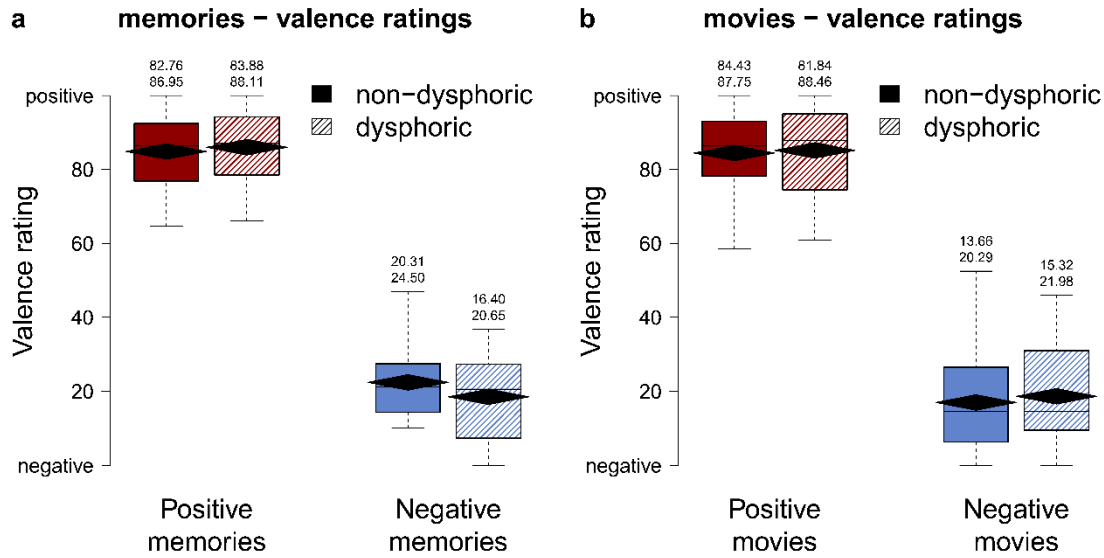

288  
289

290 **Supplementary Fig. 8 Self-reported feelings of individuals with and without dysphoria when**  
291 **reliving emotional autobiographical memories (a) or watching emotional movie clips (b).** For the  
292 boxplots, the data were first averaged across memories within condition and participant. The bounds of  
293 the boxes depict the interquartile range between the 25th and 75th percentile. The minima and maxima  
294 represent 1.5 times the interquartile range below and above the interquartile range, respectively. The  
295 horizontal bars indicate the median. The horizontal diamond shapes indicate the estimated means from  
296 the multilevel models used to evaluate the confirmatory hypotheses. The two numbers above each box  
297 represent the lower and upper bound of the Bayesian credible interval. The figure presents data from  
298 781 memories (a), and 319 movie clips (b) of  $n = 40$  participants with and  $n = 40$  participants without  
299 dysphoria. Red elements refer to positive memories or movies, blue elements refer to negative  
300 memories or movies.

301

302  
303  
304

**SUPPLEMENTARY NOTE 7:  
FEMG ACTIVITY WHILE WATCHING MOVIE CLIPS  
(REGISTERED REPORT DATA)**

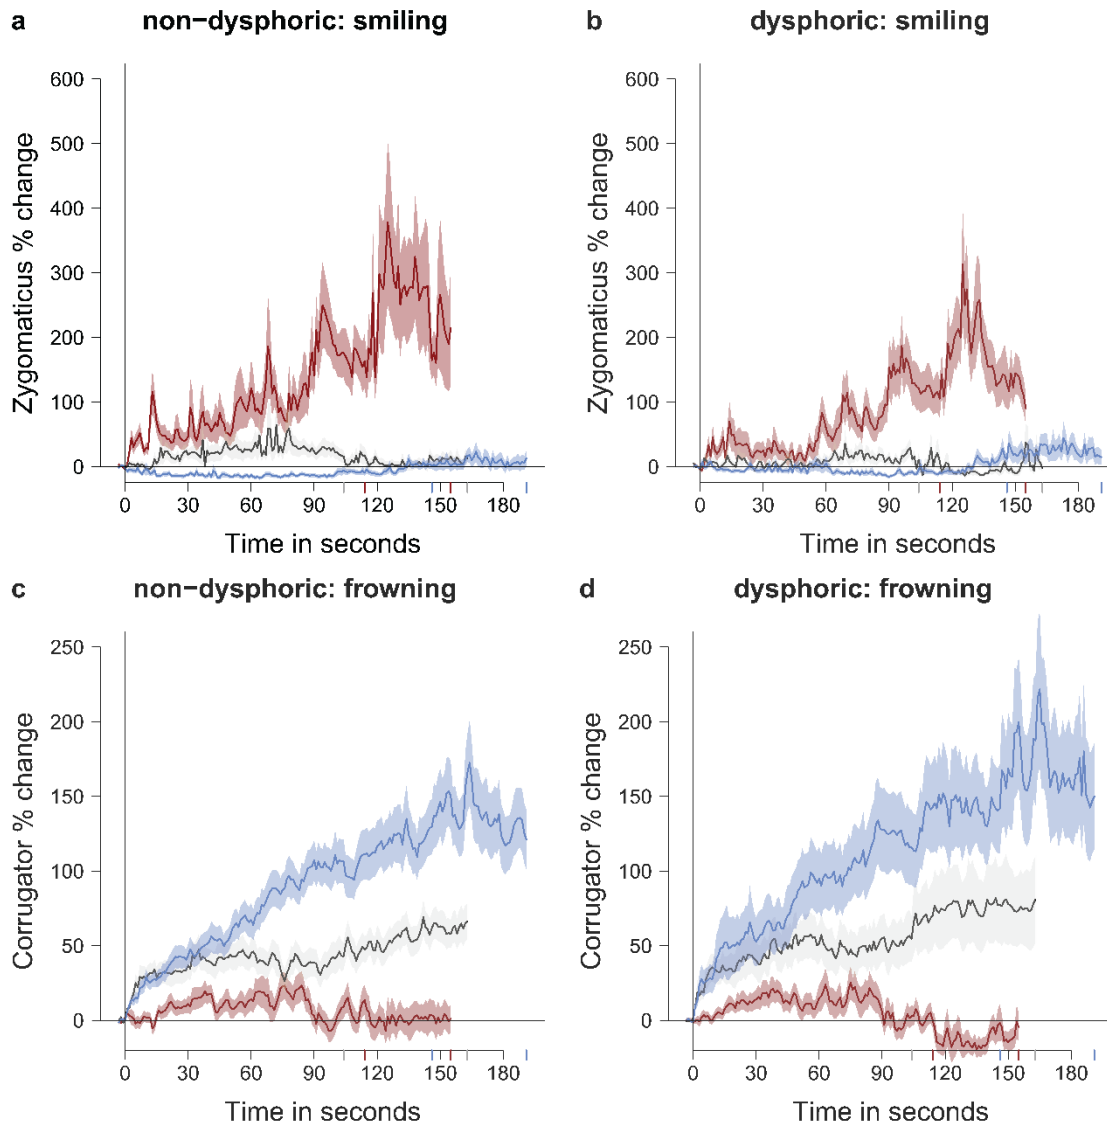

305

306

307

308

309

310

311

312

313

314

315

316

317

**Supplementary Fig. 9 Zygomaticus and corrugator activity of participants with and without dysphoria while watching movie clips.** **a** and **b** present zygomaticus over time in the non-dysphoric and dysphoric group for the positive, negative, and neutral conditions. **c** and **d** present corrugator activity. Muscle activity is presented as percentage change from baseline (4s). The vertical line indicates the onset of the memory cues (0 s). For the remaining 50 seconds participants kept silently reliving the memory. The coloured ticks on the x axis indicate the end of specific movie clips because movies have slightly different durations. The error bands represent the standard error of the mean. The data was averaged across memories within each participant before calculating the average and standard error for each time point across participants.



318  
319  
320  
321

**SUPPLEMENTARY NOTE 8:  
RESULTS FROM BAYESIAN INFORMATIVE HYPOTHESIS TESTING  
INCLUDING SENSITIVITY ANALYSES**

322 **Supplementary Table 7.** Sensitivity analyses for Bayesian data quality checks for the zygomaticus (a)  
323 and corrugator (b). Since a was conducted on the fEMG data before standardization, we conducted an  
324 additional quality check in which we tested whether the standardized fEMG response during memory  
325 recall was different from 0 (c).

326

327 **a**

| <b>zygomaticus</b>        |                    | <b>non-dysphoric</b> |                         |                          | <b>dysphoric</b>       |                          |
|---------------------------|--------------------|----------------------|-------------------------|--------------------------|------------------------|--------------------------|
|                           |                    | <b>fraction</b>      | <b>BF<sub>IC</sub></b>  | <b>PostP<sub>i</sub></b> | <b>BF<sub>IC</sub></b> | <b>PostP<sub>i</sub></b> |
| recall<br>vs<br>baseline  | recall > baseline  | 1                    | 22.861*10 <sup>12</sup> | > .999                   | 3796.823               | 0.988                    |
|                           |                    | 2                    | 22.861*10 <sup>12</sup> | > .999                   | 3796.823               | 0.991                    |
|                           |                    | 3                    | 22.861*10 <sup>12</sup> | > .999                   | 3796.823               | 0.993                    |
|                           | recall < baseline  | 1                    | 0.000                   | < .001                   | 0.000                  | < .001                   |
|                           |                    | 2                    | 0.000                   | < .001                   | 0.000                  | < .001                   |
|                           |                    | 3                    | 0.000                   | < .001                   | 0.000                  | < .001                   |
|                           | recall = baseline  | 1                    | 0.000                   | < .001                   | 0.024                  | 0.012                    |
|                           |                    | 2                    | 0.000                   | < .001                   | 0.017                  | 0.008                    |
|                           |                    | 3                    | 0.000                   | < .001                   | 0.014                  | 0.007                    |
| positive<br>vs<br>neutral | positive > neutral | 1                    | 41.544*10 <sup>9</sup>  | > .999                   | 9868.495               | 0.995                    |
|                           |                    | 2                    | 41.544*10 <sup>9</sup>  | > .999                   | 9868.495               | 0.996                    |
|                           |                    | 3                    | 41.544*10 <sup>9</sup>  | > .999                   | 9868.495               | 0.997                    |
|                           | positive < neutral | 1                    | 0.000                   | < .001                   | 0.000                  | < .001                   |
|                           |                    | 2                    | 0.000                   | < .001                   | 0.000                  | < .001                   |
|                           |                    | 3                    | 0.000                   | < .001                   | 0.000                  | < .001                   |
|                           | positive = neutral | 1                    | 0.000                   | < .001                   | 0.010                  | .005                     |
|                           |                    | 2                    | 0.000                   | < .001                   | 0.007                  | .003                     |
|                           |                    | 3                    | 0.000                   | < .001                   | 0.006                  | .003                     |

328  
329

330 **b**

| corrugator                |                    | fraction | non-dysphoric          |                    | dysphoric        |                    |
|---------------------------|--------------------|----------|------------------------|--------------------|------------------|--------------------|
|                           |                    |          | BF <sub>iC</sub>       | PostP <sub>i</sub> | BF <sub>iC</sub> | PostP <sub>i</sub> |
| recall<br>vs<br>baseline  | recall > baseline  | 1        | 67.850                 | .737               | 16.654           | .457               |
|                           |                    | 2        | 67.850                 | .796               | 16.654           | .538               |
|                           |                    | 3        | 67.850                 | .825               | 16.654           | .584               |
|                           | recall < baseline  | 1        | 0.015                  | .011               | 0.060            | .027               |
|                           |                    | 2        | 0.015                  | .012               | 0.060            | .032               |
|                           |                    | 3        | 0.015                  | .012               | 0.060            | .035               |
|                           | recall = baseline  | 1        | 0.673                  | .252               | 2.132            | .516               |
|                           |                    | 2        | 0.476                  | .192               | 1.508            | .430               |
|                           |                    | 3        | 0.388                  | .163               | 1.231            | .381               |
| negative<br>vs<br>neutral | negative > neutral | 1        | 12.775*10 <sup>4</sup> | > .999             | 46760.609        | .999               |
|                           |                    | 2        | 12.775*10 <sup>4</sup> | > .999             | 46760.609        | .999               |
|                           |                    | 3        | 12.775*10 <sup>4</sup> | > .999             | 46760.609        | .999               |
|                           | negative < neutral | 1        | 0.000                  | < .001             | 0.000            | < .001             |
|                           |                    | 2        | 0.000                  | < .001             | 0.000            | < .001             |
|                           |                    | 3        | 0.000                  | < .001             | 0.000            | < .001             |
|                           | negative = neutral | 1        | 0.001                  | < .001             | 0.001            | .001               |
|                           |                    | 2        | 0.001                  | < .001             | 0.001            | .001               |
|                           |                    | 3        | 0.001                  | < .001             | 0.001            | .001               |

331

332

| exploratory data quality checks |            | non-dysphoric |                         |                    | dysphoric             |                    |
|---------------------------------|------------|---------------|-------------------------|--------------------|-----------------------|--------------------|
|                                 |            | fraction      | BF <sub>iC</sub>        | PostP <sub>i</sub> | BF <sub>iC</sub>      | PostP <sub>i</sub> |
| zygo-<br>maticus                | recall > 0 | 1             | 22.919*10 <sup>12</sup> | > .999             | 1039849               | > .999             |
|                                 |            | 2             | 22.919*10 <sup>12</sup> | > .999             | 1039849               | > .999             |
|                                 |            | 3             | 22.919*10 <sup>12</sup> | > .999             | 1039849               | > .999             |
| positive<br>recall<br>vs 0      | recall < 0 | 1             | 0.000                   | < .001             | 0.000                 | < .001             |
|                                 |            | 2             | 0.000                   | < .001             | 0.000                 | < .001             |
|                                 |            | 3             | 0.000                   | < .001             | 0.000                 | < .001             |
|                                 | recall = 0 | 1             | 0.000                   | < .001             | 0.000                 | < .001             |
|                                 |            | 2             | 0.000                   | < .001             | 0.000                 | < .001             |
|                                 |            | 3             | 0.000                   | < .001             | 0.000                 | < .001             |
| corrugator                      | recall > 0 | 1             | 48.954*10 <sup>7</sup>  | > .999             | 2.181*10 <sup>6</sup> | > .999             |
|                                 |            | 2             | 48.954*10 <sup>7</sup>  | > .999             | 2.181*10 <sup>6</sup> | > .999             |
|                                 |            | 3             | 48.954*10 <sup>7</sup>  | > .999             | 2.181*10 <sup>6</sup> | > .999             |
| negative<br>recall<br>vs 0      | recall < 0 | 1             | 0.000                   | < .001             | 0.000                 | < .001             |
|                                 |            | 2             | 0.000                   | < .001             | 0.000                 | < .001             |
|                                 |            | 3             | 0.000                   | < .001             | 0.000                 | < .001             |
|                                 | recall = 0 | 1             | 0.000                   | < .001             | 0.000                 | < .001             |
|                                 |            | 2             | 0.000                   | < .001             | 0.000                 | < .001             |
|                                 |            | 3             | 0.000                   | < .001             | 0.000                 | < .001             |

336 **Supplementary Table 8.** Sensitivity analyses for the analyses of affective responses measured with  
 337 fEMG. **a** presents results from the primary preregistered analysis of fEMG responses to memories. **b**  
 338 presents results from an exploratory analysis including a positive attenuation hypothesis. **c** presents the  
 339 preregistered analysis of fEMG responses to movies. **d** presents results from an exploratory analysis of  
 340 responses to movies including a positive attenuation hypothesis.

341 **a**

| fEMG                    | fraction | BF <sub>iC</sub> | PostP <sub>i</sub> |
|-------------------------|----------|------------------|--------------------|
| overgeneral memory bias | 1        | 1.650            | .292               |
|                         | 2        | 1.822            | .295               |
|                         | 3        | 1.745            | .283               |
| negativity bias         | 1        | 5.642            | .691               |
|                         | 2        | 6.061            | .700               |
|                         | 3        | 6.391            | .713               |
| null hypothesis         | 1        | 0.054            | .012               |
|                         | 2        | 0.027            | .006               |
|                         | 3        | 0.018            | .004               |
| fail-safe               | 1        | -                | .005               |
|                         | 2        | -                | < .001             |
|                         | 3        | -                | < .001             |

342

343

344 **b**

| fEMG - exploratory   | fraction | BF <sub>iC</sub> | PostP <sub>i</sub> |
|----------------------|----------|------------------|--------------------|
| negativity bias      | 1        | 5.947            | .121               |
|                      | 2        | 5.895            | .162               |
|                      | 3        | 6.182            | .197               |
| positive attenuation | 1        | 24.113           | .879               |
|                      | 2        | 17.050           | .838               |
|                      | 3        | 13.922           | .803               |

345

346

347 **c**

| <b>fEMG – movies</b> | <b>fraction</b> | <b>BF<sub>IC</sub></b> | <b>PostP<sub>i</sub></b> |
|----------------------|-----------------|------------------------|--------------------------|
| negativity bias      | 1               | 7.164                  | .878                     |
|                      | 2               | 7.236                  | .879                     |
|                      | 3               | 7.222                  | .878                     |
| fail-safe            | 1               | -                      | .122                     |
|                      | 2               | -                      | .121                     |
|                      | 3               | -                      | .122                     |

348 **d**

| <b>fEMG – movies</b> | <b>fraction</b> | <b>BF<sub>IC</sub></b> | <b>PostP<sub>i</sub></b> |
|----------------------|-----------------|------------------------|--------------------------|
| negativity bias      | 1               | 7.241                  | .153                     |
|                      | 2               | 7.201                  | .201                     |
|                      | 3               | 7.207                  | .236                     |
| positive attenuation | 1               | 17.180                 | .826                     |
|                      | 2               | 12.148                 | .771                     |
|                      | 3               | 9.919                  | .732                     |
| fail-safe            | 1               | -                      | .021                     |
|                      | 2               | -                      | .028                     |
|                      | 3               | -                      | .033                     |

349

350 **Supplementary Table 9.** Sensitivity analyses for the analyses of affective valence measured self-  
 351 report. **a** presents results from the primary preregistered analysis of the memory data. **b** presents the  
 352 preregistered analysis of the movie data.

353 **a**

| valence                 | fraction | BF <sub>IC</sub> | PostP <sub>i</sub> |
|-------------------------|----------|------------------|--------------------|
| overgeneral memory bias | 1        | 0.805            | .083               |
|                         | 2        | 0.803            | .134               |
|                         | 3        | 0.811            | .520               |
| negativity bias         | 1        | 0.003            | < .001             |
|                         | 2        | 0.003            | .001               |
|                         | 3        | 0.003            | .001               |
| null hypothesis         | 1        | 7.814            | .765               |
|                         | 2        | 3.907            | .619               |
|                         | 3        | 2.605            | .520               |
| fail-safe               | 1        | -                | .151               |
|                         | 2        | -                | .246               |
|                         | 3        | -                | .309               |

354

355 **b**

| valence – movies       | fraction | BF <sub>IC</sub> | PostP <sub>i</sub> |
|------------------------|----------|------------------|--------------------|
| null hypothesis        | 1        | 114.357          | .991               |
|                        | 2        | 57.178           | .983               |
|                        | 3        | 114.357          | .991               |
| fail-safe (complement) | 1        | -                | .009               |
|                        | 2        | -                | .017               |
|                        | 3        | -                | .009               |

356

357 **Supplementary Table 10.** Sensitivity analyses for the analyses of episodic detail.

358

| episodic detail         | fraction | BF <sub>IC</sub> | PostP <sub>i</sub> |
|-------------------------|----------|------------------|--------------------|
| overgeneral memory bias | 1        | 0.118            | .023               |
|                         | 2        | 0.113            | .025               |
|                         | 3        | 0.109            | .022               |
| negativity bias         | 1        | 28.767           | .882               |
|                         | 2        | 26.219           | .902               |
|                         | 3        | 24.688           | .951               |
| null hypothesis         | 1        | 0.438            | .059               |
|                         | 2        | 0.219            | .034               |
|                         | 3        | 0.146            | .022               |
| fail-safe               | 1        | -                | .036               |
|                         | 2        | -                | .042               |
|                         | 3        | -                | .046               |

359

360

361 **Supplementary Table 11.** Sensitivity analyses for the relationship of fEMG responses to memories  
 362 and episodic detail. **a** presents the results regarding the relationship between zygomaticus responses to  
 363 positive memories and episodic detail for participants with and without dysphoria, **b** presents results  
 364 regarding group differences in this relationship. **c** and **d** present the same for the relationship of  
 365 corrugator responses to negative memories and episodic detail. dys: dysphoric; non-dys: non-dysphoric.

366 **a**

|                                                                  |              | positive memories - zygomaticus |                  | non-dysphoric      |                  | dysphoric          |  |
|------------------------------------------------------------------|--------------|---------------------------------|------------------|--------------------|------------------|--------------------|--|
|                                                                  |              | fraction                        | BF <sub>iC</sub> | PostP <sub>i</sub> | BF <sub>iC</sub> | PostP <sub>i</sub> |  |
| within-<br>participant<br>relationship<br>of affect &<br>detail  | $\gamma > 0$ | 1                               | 0.727            | .059               | 0.340            | .042               |  |
|                                                                  |              | 2                               | 0.727            | .079               | 0.340            | .056               |  |
|                                                                  |              | 3                               | 0.727            | .093               | 0.340            | .065               |  |
|                                                                  | $\gamma < 0$ | 1                               | 1.376            | .081               | 2.939            | .124               |  |
|                                                                  |              | 2                               | 1.376            | .108               | 2.939            | .164               |  |
|                                                                  |              | 3                               | 1.376            | .127               | 2.939            | .191               |  |
|                                                                  | $\gamma = 0$ | 1                               | 12.281           | .860               | 10.060           | .834               |  |
|                                                                  |              | 2                               | 8.684            | .813               | 7.114            | .781               |  |
|                                                                  |              | 3                               | 7.090            | .780               | 5.808            | .744               |  |
| between-<br>participant<br>relationship<br>of affect &<br>detail | $\beta > 0$  | 1                               | 8.511            | .232               | 3.811            | .144               |  |
|                                                                  |              | 2                               | 8.511            | .296               | 3.811            | .189               |  |
|                                                                  |              | 3                               | 8.511            | .338               | 3.811            | .220               |  |
|                                                                  | $\beta > 0$  | 1                               | 0.117            | .027               | 0.262            | .038               |  |
|                                                                  |              | 2                               | 0.117            | .035               | 0.262            | .050               |  |
|                                                                  |              | 3                               | 0.117            | .040               | 0.262            | .058               |  |
|                                                                  | $\beta = 0$  | 1                               | 5.716            | .741               | 8.997            | .818               |  |
|                                                                  |              | 2                               | 4.042            | .669               | 6.361            | .761               |  |
|                                                                  |              | 3                               | 3.300            | .623               | 5.194            | .722               |  |

367

368



**group differences - zygomaticus**

|                                                                  |                                                 | fraction | BF <sub>iC</sub> | PostP <sub>i</sub> |
|------------------------------------------------------------------|-------------------------------------------------|----------|------------------|--------------------|
| within-<br>participant<br>relationship<br>of affect &<br>detail  | $\gamma_{\text{dys}} > \gamma_{\text{non-dys}}$ | 1        | 1.737            | .092               |
|                                                                  |                                                 | 2        | 1.737            | .123               |
|                                                                  |                                                 | 3        | 1.737            | .144               |
|                                                                  | $\gamma_{\text{dys}} < \gamma_{\text{non-dys}}$ | 1        | 0.576            | .053               |
|                                                                  |                                                 | 2        | 0.576            | .071               |
|                                                                  |                                                 | 3        | 0.576            | .083               |
|                                                                  | $\gamma_{\text{dys}} = \gamma_{\text{non-dys}}$ | 1        | 11.808           | .855               |
|                                                                  |                                                 | 2        | 8.350            | .807               |
|                                                                  |                                                 | 3        | 6.818            | .773               |
| between-<br>participant<br>relationship<br>of affect &<br>detail | $\beta_{\text{dys}} > \beta_{\text{non-dys}}$   | 1        | 1.255            | .077               |
|                                                                  |                                                 | 2        | 1.255            | .103               |
|                                                                  |                                                 | 3        | 1.255            | .122               |
|                                                                  | $\beta_{\text{dys}} < \beta_{\text{non-dys}}$   | 1        | 0.797            | .062               |
|                                                                  |                                                 | 2        | 0.797            | .082               |
|                                                                  |                                                 | 3        | 0.797            | .097               |
|                                                                  | $\beta_{\text{dys}} = \beta_{\text{non-dys}}$   | 1        | 12.402           | .861               |
|                                                                  |                                                 | 2        | 8.770            | .814               |
|                                                                  |                                                 | 3        | 7.160            | .782               |

|                                                                  |              | negative memories - corrugator |                  | non-dysphoric      |                  | dysphoric          |  |
|------------------------------------------------------------------|--------------|--------------------------------|------------------|--------------------|------------------|--------------------|--|
|                                                                  |              | fraction                       | BF <sub>iC</sub> | PostP <sub>i</sub> | BF <sub>iC</sub> | PostP <sub>i</sub> |  |
| within-<br>participant<br>relationship<br>of affect &<br>detail  | $\gamma > 0$ | 1                              | 0.141            | .030               | 0.463            | .050               |  |
|                                                                  |              | 2                              | 0.141            | .039               | 0.463            | .066               |  |
|                                                                  |              | 3                              | 0.141            | .044               | 0.463            | .077               |  |
|                                                                  | $\gamma < 0$ | 1                              | 7.109            | .215               | 2.160            | .107               |  |
|                                                                  |              | 2                              | 7.109            | .275               | 2.160            | .142               |  |
|                                                                  |              | 3                              | 7.109            | .315               | 2.160            | .166               |  |
|                                                                  | $\gamma = 0$ | 1                              | 6.173            | .755               | 10.776           | .843               |  |
|                                                                  |              | 2                              | 4.365            | .686               | 7.620            | .792               |  |
|                                                                  |              | 3                              | 3.564            | .641               | 6.221            | .757               |  |
| between-<br>participant<br>relationship<br>of affect &<br>detail | $\beta > 0$  | 1                              | 0.285            | .040               | 0.179            | .033               |  |
|                                                                  |              | 2                              | 0.285            | .053               | 0.179            | .043               |  |
|                                                                  |              | 3                              | 0.285            | .062               | 0.179            | .050               |  |
|                                                                  | $\beta < 0$  | 1                              | 3.512            | .142               | 5.591            | .186               |  |
|                                                                  |              | 2                              | 3.512            | .186               | 5.591            | .241               |  |
|                                                                  |              | 3                              | 3.512            | .216               | 5.591            | .278               |  |
|                                                                  | $\beta = 0$  | 1                              | 9.002            | .818               | 7.112            | .781               |  |
|                                                                  |              | 2                              | 6.365            | .761               | 5.029            | .715               |  |
|                                                                  |              | 3                              | 5.197            | .722               | 4.106            | .672               |  |

**group differences - corrugator**

|                                                                  |                                                 | fraction | BF <sub>iC</sub> | PostP <sub>i</sub> |
|------------------------------------------------------------------|-------------------------------------------------|----------|------------------|--------------------|
| within-<br>participant<br>relationship<br>of affect &<br>detail  | $\gamma_{\text{dys}} > \gamma_{\text{non-dys}}$ | 1        | 0.480            | .050               |
|                                                                  |                                                 | 2        | 0.480            | .067               |
|                                                                  |                                                 | 3        | 0.480            | .078               |
|                                                                  | $\gamma_{\text{dys}} < \gamma_{\text{non-dys}}$ | 1        | 2.081            | .105               |
|                                                                  |                                                 | 2        | 2.081            | .139               |
|                                                                  |                                                 | 3        | 2.081            | .163               |
|                                                                  | $\gamma_{\text{dys}} = \gamma_{\text{non-dys}}$ | 1        | 10.890           | .845               |
|                                                                  |                                                 | 2        | 7.700            | .794               |
|                                                                  |                                                 | 3        | 6.287            | .759               |
| between-<br>participant<br>relationship<br>of affect &<br>detail | $\beta_{\text{dys}} > \beta_{\text{non-dys}}$   | 1        | 1.538            | .089               |
|                                                                  |                                                 | 2        | 1.538            | .118               |
|                                                                  |                                                 | 3        | 1.538            | .139               |
|                                                                  | $\beta_{\text{dys}} < \beta_{\text{non-dys}}$   | 1        | 0.650            | .058               |
|                                                                  |                                                 | 2        | 0.650            | .077               |
|                                                                  |                                                 | 3        | 0.650            | .090               |
|                                                                  | $\beta_{\text{dys}} = \beta_{\text{non-dys}}$   | 1        | 11.648           | .853               |
|                                                                  |                                                 | 2        | 8.237            | .805               |
|                                                                  |                                                 | 3        | 6.725            | .771               |

378 **Supplementary Table 12.** Sensitivity analyses for the relationship of valence ratings of memories and  
 379 episodic detail. **a** presents the results regarding the relationship between valence ratings of positive  
 380 memories and episodic detail for participants with and without dysphoria, **b** presents results regarding  
 381 group differences in this relationship. **c** and **d** present the same for valence ratings of negative memories  
 382 and episodic detail. dys: dysphoric; non-dys: non-dysphoric.

383 **a**

|                                                                  |              | positive memories – valence |                  |                    | non-dysphoric    |                    | dysphoric |  |
|------------------------------------------------------------------|--------------|-----------------------------|------------------|--------------------|------------------|--------------------|-----------|--|
|                                                                  |              | fraction                    | BF <sub>iC</sub> | PostP <sub>i</sub> | BF <sub>iC</sub> | PostP <sub>i</sub> |           |  |
| within-<br>participant<br>relationship<br>of affect &<br>detail  | $\gamma > 0$ | 1                           | 3.810            | .140               | 2130.129         | .973               |           |  |
|                                                                  |              | 2                           | 3.810            | .185               | 2130.129         | .981               |           |  |
|                                                                  |              | 3                           | 3.810            | .215               | 2130.129         | .984               |           |  |
|                                                                  | $\gamma < 0$ | 1                           | 0.262            | .037               | 0.000            | < .001             |           |  |
|                                                                  |              | 2                           | 0.262            | .049               | 0.000            | < .001             |           |  |
|                                                                  |              | 3                           | 0.262            | .056               | 0.000            | < .001             |           |  |
|                                                                  | $\gamma = 0$ | 1                           | 9.288            | .823               | 0.054            | .026               |           |  |
|                                                                  |              | 2                           | 6.568            | .767               | 0.038            | .019               |           |  |
|                                                                  |              | 3                           | 5.362            | .728               | 0.031            | .015               |           |  |
| between-<br>participant<br>relationship<br>of affect &<br>detail | $\beta > 0$  | 1                           | 9.644            | .244               | 4.471            | .154               |           |  |
|                                                                  |              | 2                           | 9.644            | .310               | 4.471            | .202               |           |  |
|                                                                  |              | 3                           | 9.644            | .353               | 4.471            | .235               |           |  |
|                                                                  | $\beta > 0$  | 1                           | 0.104            | .025               | 0.224            | .035               |           |  |
|                                                                  |              | 2                           | 0.104            | .032               | 0.224            | .045               |           |  |
|                                                                  |              | 3                           | 0.104            | .037               | 0.224            | .053               |           |  |
|                                                                  | $\beta = 0$  | 1                           | 5.435            | .731               | 8.589            | .811               |           |  |
|                                                                  |              | 2                           | 3.843            | .658               | 6.074            | .752               |           |  |
|                                                                  |              | 3                           | 3.138            | .611               | 4.959            | .713               |           |  |

384

385

386 **b**

**group differences - valence**

|                                                                  |                                                 | fraction | BF <sub>iC</sub> | PostP <sub>i</sub> |
|------------------------------------------------------------------|-------------------------------------------------|----------|------------------|--------------------|
| within-<br>participant<br>relationship<br>of affect &<br>detail  | $\gamma_{\text{dys}} > \gamma_{\text{non-dys}}$ | 1        | 0.034            | .015               |
|                                                                  |                                                 | 2        | 0.034            | .018               |
|                                                                  |                                                 | 3        | 0.034            | .019               |
|                                                                  | $\gamma_{\text{dys}} < \gamma_{\text{non-dys}}$ | 1        | 29.689           | .444               |
|                                                                  |                                                 | 2        | 29.689           | .527               |
|                                                                  |                                                 | 3        | 29.689           | .575               |
|                                                                  | $\gamma_{\text{dys}} = \gamma_{\text{non-dys}}$ | 1        | 2.362            | .541               |
|                                                                  |                                                 | 2        | 1.670            | .455               |
|                                                                  |                                                 | 3        | 1.364            | .405               |
| between-<br>participant<br>relationship<br>of affect &<br>detail | $\beta_{\text{dys}} > \beta_{\text{non-dys}}$   | 1        | 1.194            | .073               |
|                                                                  |                                                 | 2        | 1.194            | .098               |
|                                                                  |                                                 | 3        | 1.194            | .116               |
|                                                                  | $\beta_{\text{dys}} < \beta_{\text{non-dys}}$   | 1        | 0.837            | .061               |
|                                                                  |                                                 | 2        | 0.837            | .082               |
|                                                                  |                                                 | 3        | 0.837            | .097               |
|                                                                  | $\beta_{\text{dys}} = \beta_{\text{non-dys}}$   | 1        | 12.854           | .865               |
|                                                                  |                                                 | 2        | 9.089            | .820               |
|                                                                  |                                                 | 3        | 7.421            | .788               |

387

388

| negative memories - valence                                      |              | non-dysphoric |                  | dysphoric          |                  |                    |      |
|------------------------------------------------------------------|--------------|---------------|------------------|--------------------|------------------|--------------------|------|
|                                                                  |              | fraction      | BF <sub>iC</sub> | PostP <sub>i</sub> | BF <sub>iC</sub> | PostP <sub>i</sub> |      |
| within-<br>participant<br>relationship<br>of affect &<br>detail  | $\gamma > 0$ | 1             | 0.209            | .032               | 0.071            | .021               |      |
|                                                                  |              | 2             | 0.209            | .042               | 0.071            | .026               |      |
|                                                                  |              | 3             | 0.209            | .049               | 0.071            | .029               |      |
|                                                                  | $\gamma < 0$ | 1             | 4.778            | .153               | 13.992           | .289               |      |
|                                                                  |              | 2             | 4.778            | .201               | 13.992           | .362               |      |
|                                                                  |              | 3             | 4.778            | .233               | 13.992           | .408               |      |
|                                                                  |              | $\gamma = 0$  | 1                | 8.835              | .815             | 4.465              | .691 |
|                                                                  |              |               | 2                | 6.247              | .757             | 3.157              | .612 |
|                                                                  |              |               | 3                | 5.101              | .718             | 2.578              | .563 |
| between-<br>participant<br>relationship<br>of affect &<br>detail | $\beta > 0$  | 1             | 0.692            | .053               | 0.137            | .027               |      |
|                                                                  |              | 2             | 0.692            | .071               | 0.137            | .035               |      |
|                                                                  |              | 3             | 0.692            | .084               | 0.137            | .040               |      |
|                                                                  | $\beta < 0$  | 1             | 1.445            | .077               | 7.297            | .197               |      |
|                                                                  |              | 2             | 1.445            | .103               | 7.297            | .255               |      |
|                                                                  |              | 3             | 1.445            | .121               | 7.297            | .293               |      |
|                                                                  | $\beta = 0$  | 1             | 13.411           | .870               | 6.926            | .776               |      |
|                                                                  |              | 2             | 9.483            | .826               | 4.897            | .710               |      |
|                                                                  |              | 3             | 7.743            | .795               | 3.999            | .667               |      |

**group differences - valence**

|                                                                  |                                                 | fraction | BF <sub>iC</sub> | PostP <sub>i</sub> |
|------------------------------------------------------------------|-------------------------------------------------|----------|------------------|--------------------|
| within-<br>participant<br>relationship<br>of affect &<br>detail  | $\gamma_{\text{dys}} > \gamma_{\text{non-dys}}$ | 1        | 2.011            | .092               |
|                                                                  |                                                 | 2        | 2.011            | .123               |
|                                                                  |                                                 | 3        | 2.011            | .145               |
|                                                                  | $\gamma_{\text{dys}} < \gamma_{\text{non-dys}}$ | 1        | 0.497            | .046               |
|                                                                  |                                                 | 2        | 0.497            | .061               |
|                                                                  |                                                 | 3        | 0.497            | .072               |
|                                                                  | $\gamma_{\text{dys}} = \gamma_{\text{non-dys}}$ | 1        | 12.531           | .862               |
|                                                                  |                                                 | 2        | 8.861            | .816               |
|                                                                  |                                                 | 3        | 7.235            | .783               |
| between-<br>participant<br>relationship<br>of affect &<br>detail | $\beta_{\text{dys}} > \beta_{\text{non-dys}}$   | 1        | 3.309            | .123               |
|                                                                  |                                                 | 2        | 3.309            | .163               |
|                                                                  |                                                 | 3        | 3.309            | .190               |
|                                                                  | $\beta_{\text{dys}} < \beta_{\text{non-dys}}$   | 1        | 0.302            | .037               |
|                                                                  |                                                 | 2        | 0.302            | .049               |
|                                                                  |                                                 | 3        | 0.302            | .057               |
|                                                                  | $\beta_{\text{dys}} = \beta_{\text{non-dys}}$   | 1        | 10.534           | .840               |
|                                                                  |                                                 | 2        | 7.448            | .788               |
|                                                                  |                                                 | 3        | 6.082            | .753               |

395 **Supplementary Table 13.** Sensitivity analyses for explorative analyses of zygomaticus and corrugator  
 396 responses over the course of task.  
 397

| fEMG responses |                 | non-dysphoric |                  | dysphoric          |                  |                    |
|----------------|-----------------|---------------|------------------|--------------------|------------------|--------------------|
|                |                 | fraction      | BF <sub>IC</sub> | PostP <sub>i</sub> | BF <sub>IC</sub> | PostP <sub>i</sub> |
| zygomaticus    | habituation     | 1             | 2.392            | .016               | 0.213            | .009               |
|                |                 | 2             | 2.578            | .063               | 0.205            | .031               |
|                |                 | 3             | 2.533            | .132               | 0.210            | .059               |
|                | null hypothesis | 1             | 147.947          | .016               | 21.418           | .946               |
|                |                 | 2             | 36.987           | .936               | 5.355            | .815               |
|                |                 | 3             | 16.439           | .125               | 2.380            | .661               |
|                | Fail-safe       | 1             | -                | .007               | -                | .044               |
|                |                 | 2             | -                | .024               | -                | .153               |
|                |                 | 3             | -                | .050               | -                | .280               |
| corrugator     | habituation     | 1             | 0.507            | .003               | 0.043            | .008               |
|                |                 | 2             | 0.482            | .011               | 0.047            | .021               |
|                |                 | 3             | 0.500            | .025               | 0.046            | .030               |
|                | null hypothesis | 1             | 164.817          | .991               | 4.676            | .816               |
|                |                 | 2             | 41.204           | .965               | 1.169            | .526               |
|                |                 | 3             | 18.313           | .924               | 0.520            | .330               |
|                | Fail-safe       | 1             | -                | .006               | -                | .176               |
|                |                 | 2             | -                | .024               | -                | .453               |
|                |                 | 3             | -                | .051               | -                | .640               |

398

399



400 **Supplementary Table 14.** Sensitivity analyses for explorative analyses of depressive symptom severity  
 401 within the dysphoric group as a predictor of episodic detail.  
 402

|                      |             | BDI – episodic detail association |                  |                    | dysphoric |  |
|----------------------|-------------|-----------------------------------|------------------|--------------------|-----------|--|
|                      |             | fraction                          | BF <sub>iC</sub> | PostP <sub>i</sub> |           |  |
| positive<br>memories | $\beta > 0$ | 1                                 | 1.536            | .117               |           |  |
|                      |             | 2                                 | 1.536            | .153               |           |  |
|                      |             | 3                                 | 1.536            | .177               |           |  |
|                      | $\beta < 0$ | 1                                 | 0.651            | .076               |           |  |
|                      |             | 2                                 | 0.651            | .099               |           |  |
|                      |             | 3                                 | 0.651            | .115               |           |  |
|                      | $\beta = 0$ | 1                                 | 8.383            | .907               |           |  |
|                      |             | 2                                 | 5.928            | .748               |           |  |
|                      |             | 3                                 | 4.840            | .708               |           |  |
| negative<br>memories | $\beta > 0$ | 1                                 | 5.050            | .202               |           |  |
|                      |             | 2                                 | 5.050            | .259               |           |  |
|                      |             | 3                                 | 5.050            | .297               |           |  |
|                      | $\beta < 0$ | 1                                 | 0.198            | .040               |           |  |
|                      |             | 2                                 | 0.198            | .051               |           |  |
|                      |             | 3                                 | 0.198            | .059               |           |  |
|                      | $\beta = 0$ | 1                                 | 6.273            | .758               |           |  |
|                      |             | 2                                 | 4.435            | .689               |           |  |
|                      |             | 3                                 | 3.621            | .644               |           |  |

403

404

405 **Supplementary Table 15.** Sensitivity analyses for explorative analyses of depressive symptom severity  
 406 within the dysphoric group as a predictor of fEMG responses to emotional memories.  
 407

| BDI – fEMG response association     |             | dysphoric   |                  |                    |      |
|-------------------------------------|-------------|-------------|------------------|--------------------|------|
|                                     |             | fraction    | BF <sub>iC</sub> | PostP <sub>i</sub> |      |
| zygomaticus<br>positive<br>memories | $\beta > 0$ | 1           | 1.082            | .101               |      |
|                                     |             | 2           | 1.082            | .132               |      |
|                                     |             | 3           | 1.082            | .153               |      |
|                                     | $\beta < 0$ | 1           | 0.924            | .093               |      |
|                                     |             | 2           | 0.924            | .122               |      |
|                                     |             | 3           | 0.924            | .142               |      |
|                                     |             | $\beta = 0$ | 1                | 8.295              | .806 |
|                                     |             |             | 2                | 5.866              | .746 |
|                                     |             |             | 3                | 4.789              | .705 |
| corrugator<br>negative<br>memories  | $\beta > 0$ | 1           | 0.218            | .048               |      |
|                                     |             | 2           | 0.218            | .061               |      |
|                                     |             | 3           | 0.218            | .069               |      |
|                                     | $\beta < 0$ | 1           | 4.595            | .220               |      |
|                                     |             | 2           | 4.595            | .280               |      |
|                                     |             | 3           | 4.595            | .318               |      |
|                                     |             | $\beta = 0$ | 1                | 5.469              | .732 |
|                                     |             |             | 2                | 3.867              | .659 |
|                                     |             |             | 3                | 3.157              | .612 |

408

409

410 **Supplementary Table 16.** Sensitivity analyses for analyses of positive (a) and negative (b) affect  
 411 before and after the memory task. Positive and negative affect were assessed with the PANAS.

412 **a**

**positive affect before and after the memory task**

|                                             |               | fraction    | BF <sub>iC</sub> | PostP <sub>i</sub> |
|---------------------------------------------|---------------|-------------|------------------|--------------------|
| Group differences in affect                 | dysphoric <   | 1           | 1.488            | .142               |
|                                             | non-dysphoric | 2           | 1.378            | .220               |
|                                             |               | 3           | 1.417            | .282               |
| pre & post task                             | dysphoric =   | 1           | 6.739            | .763               |
|                                             | non-dysphoric | 2           | 3.369            | .620               |
|                                             |               | 3           | 2.246            | .519               |
|                                             |               | fail-safe   | 1                | -                  |
|                                             |               | 2           | -                | .160               |
|                                             |               | 3           | -                | .199               |
| Group differences in affect change $\Delta$ | dysphoric <   | 1           | 0.049            | .022               |
|                                             | non-dysphoric | 2           | 0.049            | .026               |
|                                             |               | 3           | 0.049            | .028               |
| post - pre task                             | dysphoric >   | 1           | 20.593           | .458               |
|                                             | non-dysphoric | 2           | 20.593           | .540               |
|                                             |               | 3           | 20.593           | .587               |
|                                             |               | dysphoric = | 1                | 2.166              |
|                                             | non-dysphoric | 2           | 1.532            | .434               |
| 3                                           |               | 1.251       | .385             |                    |

413

414

415 **b**

**negative affect before and after the memory task**

|                                      |               | fraction      | BF <sub>IC</sub>       | PostP <sub>i</sub> |      |
|--------------------------------------|---------------|---------------|------------------------|--------------------|------|
| Group differences in affect          | dysphoric >   | 1             | 29.847*10 <sup>7</sup> | > .999             |      |
|                                      | non-dysphoric | 2             | 45.646*10 <sup>7</sup> | > .999             |      |
|                                      |               | 3             | 79.150*10 <sup>7</sup> | > .999             |      |
| pre & post task                      | dysphoric =   | 1             | 0.000                  | < .001             |      |
|                                      | non-dysphoric | 2             | 0.000                  | < .001             |      |
|                                      |               | 3             | 0.000                  | < .001             |      |
|                                      | fail-safe     | 1             | -                      | < .001             |      |
|                                      |               | 2             | -                      | < .001             |      |
|                                      |               | 3             | -                      | < .001             |      |
| Group differences in affect change Δ | dysphoric >   | 1             | 0.441                  | .062               |      |
|                                      | non-dysphoric | 2             | 0.441                  | .081               |      |
|                                      |               | 3             | 0.441                  | .797               |      |
| post - pre task                      | dysphoric <   | 1             | 2.267                  | .094               |      |
|                                      | non-dysphoric | 2             | 2.267                  | .184               |      |
|                                      |               | 3             | 2.267                  | .213               |      |
|                                      | dysphoric =   | 1             | 7.848                  | .797               |      |
|                                      |               | non-dysphoric | 2                      | 5.549              | .735 |
|                                      |               |               | 3                      | 4.531              | .694 |

416  
417

418  
419  
420  
421  
422  
423  
424  
425  
426  
427  
428  
429  
430  
431  
432  
433  
434  
435  
436  
437  
438  
439  
440  
441  
442  
443  
444  
445  
446  
447  
448  
449  
450  
451  
452  
453  
454  
455  
456  
457  
458  
459  
460  
461  
462  
463  
464  
465

**SUPPLEMENTARY NOTE 9:**  
**CHANGES FROM THE INTRODUCTION AND METHODS**  
**OF THE STAGE 1 REGISTERED REPORT**

- In the methods section of the stage 1 manuscript, we included the erroneous statement:  
*“Before each session, we asked about the amount of sleep in the preceding night as well as alcohol and drug use and asked about what films or series they viewed in the night before the session.”*  
We included such an assessment in other studies on memories of emotional movie clips (<https://doi.org/10.31234/osf.io/ukt5x>) but we did not include it in this registered that focused on memories of personal events instead of movie clips. Consequently, we deleted this statement.
- In the methods section of the stage 1 manuscript, we specified:  
*“This online screening will be conducted by a person who is otherwise not involved in running the experiment, transcribing and coding of the memories. Therefore, the experimenter will be blind regarding the participants’ group allocation (dysphoric or non-dysphoric).”*  
However, transcribing and coding was time-intensive and additional help was required. Therefore, one person who was responsible for the online screening also transcribed and coded several memories (coder initials: RB). For that researcher, all identifying information was removed from the data (e.g. participant number), so that she was blind regarding the participants’ group allocation (dysphoric or non-dysphoric). Consequently, we changed the information in the methods section to:  
*“This online screening was conducted by a person who was otherwise not involved in running the experiment. The person responsible for the online screening also transcribed and coded several memories but only after all identifying information was removed, so that she was blind regarding the participants’ group allocation (dysphoric or non-dysphoric).”*
- In the methods section, we stated the following:  
*“Specifically, we report self-reported valence and arousal of the memories, the number of retrieved episodic and semantic details, memory age, and memory vividness. For all of these variables, we used BAIT to test whether there are differences between the dysphoric and non-dysphoric group that need to be taken into consideration when interpreting our results.”*  
However, given the large number of variables and conditions, conducting all of these analyses (at least 39 group comparisons) without strong justification would not be informative because they would likely yield false positive as well as false negative findings. Such potentially spurious findings should better not be considered when interpreting results from the preregistered analyses. Therefore, we did not conduct all possible comparisons. Instead, we conducted a small selection of exploratory analyses with strong justification that were important for the interpretation of our confirmatory findings.
- We removed the information that we might recruit participants through newsletters because we did not use newsletters for recruitment.
- We added a sentence to note that the tentative evidence for an association between episodic detail and fEMG responses to memories in the pilot study was not confirmed in the final registered report data.

- 466 - The informed consent for sharing recordings and transcriptions was missing one  
467 option (see point 3 below). We added that information:  
468 *“Participants further reported on a written informed consent whether we are allowed*  
469 *to share their personal memories 1) without any restrictions on an online platform*  
470 *such as OSF and during presentations, 2) with restrictions on such a platform, 3) only*  
471 *with other researchers upon request, or 4) whether we are not allowed to share their*  
472 *memories.”*
- 473 - We removed the sentence: *“The mean of the zygomaticus and corrugator activity will*  
474 *represent positive and negative movie emotionality, respectively.”* This sentence was  
475 accidentally not removed during the revisions of the stage 1 protocol when we  
476 incorporated feedback from a reviewer to use percentage change for fEMG data  
477 instead of means that are not corrected for baseline fEMG activity or difference scores  
478 from baseline. We replaced the sentence with: *“The 4 seconds directly preceding*  
479 *each movie onset were used as baseline.”*
- 480 - We deleted the overgeneral memory bias example for Test 2B to improve readability  
481 (given that the data was not in line with an overgeneral memory bias anyway):  
482 *“If Test 2A provided evidence for an overgeneral memory bias, we will compare*  
483 *evidence for the hypothesis that individuals with dysphoria show reduced affective*  
484 *responses to negative and positive movies compared to individuals without dysphoria*  
485 *(Test 2B – H1) and evidence for the hypothesis that individuals with dysphoria show*  
486 *any other pattern of affective responses to movies (Test 2B – Hc).”*
- 487 - We deleted the references to the design tables from the introduction to improve  
488 readability and the structure of the supplemental materials. The design tables are still  
489 referenced in the methods section.  
490

491

## SUPPLEMENTARY NOTE 10:

492

### MEMORY SELECTION SHEET – DUTCH ORIGINAL

493

#### AUTOBIOGRAPHICAL MEMORY TASK

---

495 PPNR:

Date:

Version: 1

496

497 In deze taak zullen we je vragen om dertien herinneringen te kiezen van gebeurtenissen die je *zelf*  
498 hebt meegemaakt. We zullen je vragen om voor iedere herinnering drie cue-woorden op te schrijven  
499 die je zullen helpen om de herinnering in de volgende sessie op te halen. Zo'n herinnering kan  
500 verwijzen naar iets dat recent of juist langer geleden is gebeurd. Belangrijk is dat de gebeurtenis of  
501 het moment van de herinnering *minstens één dag geleden* en *hoogstens vijf jaar geleden* heeft  
502 plaatsgevonden. Je zult dus herinneringen opschrijven die minstens één dag oud zijn, maar niet ouder  
503 zijn dan vijf jaar.

504

505 Specifiek zullen we je vragen om vijf herinneringen te kiezen van gebeurtenissen die je onmiskenbaar  
506 als *gelukkig* hebt ervaren en vijf herinneringen van gebeurtenissen die je onmiskenbaar als *verdrietig*  
507 hebt ervaren. Dit betekent dat je vijf herinneringen kiest van gebeurtenissen waarin je je gelukkig  
508 voelde en dat je vijf herinneringen kiest van gebeurtenissen waarin je je verdrietig voelde. Het gaat  
509 dus om gebeurtenissen die voor jou een emotionele betekenis hadden. Bedenk wel dat we je later  
510 zullen vragen de herinneringen in iets meer detail te beschrijven. Dit gebeurt anoniem, dus niet van  
511 persoon tot persoon. Kies dus alleen herinneringen waarbij je je *comfortabel* voelt de inhoud te delen  
512 voor dit onderzoek. Vanzelfsprekend behandelen we alles wat je deelt *vertrouwelijk*. Tot slot vragen  
513 we je nog om drie neutrale herinneringen te kiezen. Het is belangrijk dat die neutrale herinneringen  
514 niet gekenmerkt worden door een verdrietige of gelukkige emotie, maar dat ze voor jou echt een  
515 neutrale waarde hebben.

516

517 Verder is het belangrijk dat iedere gelukkige, verdrietige, of neutrale herinnering die je kiest verwijst  
518 naar een *specifieke* gebeurtenis. Met specifiek wordt bedoeld dat de herinnering *één bepaalde*  
519 *gebeurtenis* betreft die op een bepaalde dag en plek heeft plaatsgevonden, maar *niet langer dan één*  
520 *dag* heeft geduurd.

521

522 Als gelukkige herinnering zou je bijvoorbeeld kunnen kiezen voor *'ik voel me steeds goed op feestjes'*.  
523 Deze herinnering is echter niet specifiek, het verwijst niet naar één bepaalde gebeurtenis die op een  
524 bepaalde dag plaatsvond. Als je zou kiezen voor *'ik voelde me goed op het laatste feestje bij Veerle'* is  
525 dit beter. Dit is een specifieke gebeurtenis. Als herinnering zou je ook kunnen kiezen voor *'vorige*  
526 *zomer voelde ik me goed'*, maar dit verwijst naar een gebeurtenis die langer dan één dag heeft  
527 geduurd. Een specifieke gebeurtenis is daarentegen iets dat *één bepaalde keer* als dusdanig is  
528 gebeurd en *korter* heeft geduurd dan *één dag*.

529

530 Het is de bedoeling dat je voor iedere herinnering *drie cue-woorden* noteert die je kunnen helpen om  
531 de herinnering op te halen. Belangrijk is dat de cue-woorden voor jou direct en onmiskenbaar naar  
532 deze herinnering verwijzen. Kies dus een woord of een combinatie van woorden die specifiek genoeg  
533 zijn. Als cue-woorden voor *'het laatste verjaardagsfeestje bij Veerle'* zou je bijvoorbeeld kunnen

534 kiezen voor de specifieke cue-woorden *'feestje Veerle'*, in plaats van het bredere cue-woord  
535 *'verjaardag'*.

536 Neem zolang de tijd als nodig is om je herinneringen uit te kiezen en de cue-woorden te noteren.

537 Belangrijk is dat je **dertien verschillende** herinneringen of gebeurtenissen uitkiest. Het is dus niet de

538 bedoeling dat je tweemaal cue-woorden opschrijft voor exact eenzelfde gebeurtenis of herinnering.

539 Geef ook aan hoe lang geleden het ongeveer is dat de gebeurtenis van de herinnering plaatsvond (in

540 maanden). Als de herinnering minder dan een maand oud is, geef dan aan hoe lang geleden de

541 gebeurtenis van de herinnering plaatsvond in weken.

542

## 543 GELUKKIGE HERINNERINGEN

---

544 Kies vijf herinneringen van gebeurtenissen die je onmiskenbaar als **gelukkig** ervaart. Noteer voor

545 iedere herinnering **drie cue-woorden** die je kunnen helpen om de herinnering op te halen. Belangrijk

546 is dat de gebeurtenis **minstens één dag geleden** en **hoogstens vijf jaar geleden** heeft plaatsgevonden.

547

548

549 **Gelukkige herinnering 1** Hoe lang geleden: \_\_\_\_\_ maanden, \_\_\_\_\_ weken

550

551 Cue-woorden: \_\_\_\_\_

552

553

554 **Gelukkige herinnering 2** Hoe lang geleden: \_\_\_\_\_ maanden, \_\_\_\_\_ weken

555

556 Cue-woorden: \_\_\_\_\_

557

558

559 **Gelukkige herinnering 3** Hoe lang geleden: \_\_\_\_\_ maanden, \_\_\_\_\_ weken

560

561 Cue-woorden: \_\_\_\_\_

562

563

564 **Gelukkige herinnering 4** Hoe lang geleden: \_\_\_\_\_ maanden, \_\_\_\_\_ weken

565

566 Cue-woorden: \_\_\_\_\_

567

568

569 **Gelukkige herinnering 5** Hoe lang geleden: \_\_\_\_\_ maanden, \_\_\_\_\_ weken

570

571 Cue-woorden: \_\_\_\_\_

572

573

574



575 VERDRIETIGE HERINNERINGEN

---

576 Kies vijf herinneringen van gebeurtenissen die je onmiskenbaar als *verdrietig* ervaart. Noteer voor  
577 iedere herinnering *drie cue-woorden* die je kunnen helpen om de herinnering op te halen. Belangrijk  
578 is dat de gebeurtenis *minstens één dag geleden* en *hoogstens vijf jaar geleden* heeft plaatsgevonden.

579

580

581 Verdrietige herinnering 1 Hoe lang geleden: \_\_\_\_\_ maanden, \_\_\_\_\_ weken

582

583 Cue-woorden: \_\_\_\_\_

584

585

586 Verdrietige herinnering 2 Hoe lang geleden: \_\_\_\_\_ maanden, \_\_\_\_\_ weken

587

588 Cue-woorden: \_\_\_\_\_

589

590

591 Verdrietige herinnering 3 Hoe lang geleden: \_\_\_\_\_ maanden, \_\_\_\_\_ weken

592

593 Cue-woorden: \_\_\_\_\_

594

595

596 Verdrietige herinnering 4 Hoe lang geleden: \_\_\_\_\_ maanden, \_\_\_\_\_ weken

597

598 Cue-woorden: \_\_\_\_\_

599

600

601 Verdrietige herinnering 5 Hoe lang geleden: \_\_\_\_\_ maanden, \_\_\_\_\_ weken

602

603 Cue-woorden: \_\_\_\_\_

604

605

606

607

608

609

610

611

612

613

614 NEUTRALE HERINNERINGEN

---

615 Kies drie herinneringen van gebeurtenissen die je als *neutraal* ervaart. Noteer voor iedere herinnering  
616 *drie cue-woorden* die je kunnen helpen om de herinnering op te halen. Belangrijk is dat de  
617 gebeurtenis *minstens één dag geleden* en *hoogstens vijf jaar geleden* heeft plaatsgevonden.

618

619 Neutrale herinnering 1 Hoe lang geleden: \_\_\_\_\_ maanden, \_\_\_\_\_ weken

620

621 Cue-woorden: \_\_\_\_\_

622

623 Neutrale herinnering 2 Hoe lang geleden: \_\_\_\_\_ maanden, \_\_\_\_\_ weken

624

625 Cue-woorden: \_\_\_\_\_

626

627 Neutrale herinnering 3 Hoe lang geleden: \_\_\_\_\_ maanden, \_\_\_\_\_ weken

628

629 Cue-woorden: \_\_\_\_\_

630

631

632

## MEMORY SELECTION SHEET – ENGLISH TRANSLATION

633

### 634 AUTOBIORAFISCHE HERRINERINGENTAAK

---

635 PPNR:

Datum:

Version: 1

636

637 In this task, we will ask you to choose thirteen memories of events you have experienced **yourself**. We  
638 will ask you to write down three cue words for each memory that will help you to recall the memory  
639 in the next session. Such a memory can refer to something that happened recently or a long time ago.  
640 It is important that the event or moment of the memory occurred **at least one day ago** and **at most**  
641 **five years ago**. Hence, you will write down memories that are at least one day old, but not more than  
642 five years old.

643

644 Specifically, we will ask you to choose five memories of events that you clearly experienced as **happy**  
645 and five memories of events that you clearly experienced as **sad**. This means that you choose five  
646 memories of events during which you felt happy and five memories of events during which you felt  
647 sad. Therefore, the memories should have had emotional significance for you. Keep in mind though,  
648 that we will ask you to describe the memories more detail later. This will be done anonymously, so  
649 not from person to person. Please choose only memories that you feel **comfortable** sharing for this  
650 study. Of course, we will treat everything you share **confidentially**. Finally, we ask you to choose three  
651 neutral memories. It is important that these neutral memories are not characterized by a sad or  
652 happy emotion, but that they really have a neutral value for you.

653

654 Moreover, it is important that each happy, sad, or neutral memory that you choose refers to a  
655 **specific** event. Specific means that the memory refers to **one particular event** that took place on one  
656 day and in one place, and did **not last longer than one day**.

657

658 For a happy memory, you might for example choose "*I always feel good at parties*". However, this  
659 memory is not specific, it does not refer to one particular event that happened on a particular day. If  
660 you chose "*I felt good at the last party at Veerle's place*", this is better. This is a specific event. You  
661 could also choose "*last summer I felt good*", but this refers to an event that lasted longer than one  
662 day. In contrast, a specific event is something that **happened once** and lasted **for less than one day**.

663

664 The idea is to write down **three cue words** for each memory that can help you to recall the memory. It  
665 is important that the cue words refer directly and unmistakably to this memory for you. So choose a  
666 word or a combination of words that are specific enough. For example, as cue words for "*the last*  
667 *party at Veerle's place*," you might choose the specific cue words "party Veerle," rather than the  
668 broader cue word "birthday".

669

670 Take as much time as you need to choose your memories and write down the cue words. It is  
671 important that you choose **thirteen different** memories or events. That means, you should not write  
672 down cue words twice for the exact same event or memory.

673

674 Also indicate approximately how long ago the event of the memory took place (in months). If the  
memory is less than a month old, indicate how long ago the event of the memory occurred in weeks.

675 HAPPY MEMORIES

---

676 Choose five memories of events that you unmistakably experience as **happy**. For each memory, write  
677 down **three cue words** that can help you to recall the memory. It is important that the event  
678 happened **at least one day ago** and **at most five years ago**.

679

680

681 Happy memory 1 How long ago: \_\_\_\_\_ months, \_\_\_\_\_ weeks

682

683 Cue-words: \_\_\_\_\_

684

685

686 Happy memory 2 How long ago: \_\_\_\_\_ months, \_\_\_\_\_ weeks

687

688 Cue-words: \_\_\_\_\_

689

690

691 Happy memory 3 How long ago: \_\_\_\_\_ months, \_\_\_\_\_ weeks

692

693 Cue-words: \_\_\_\_\_

694

695

696 Happy memory 4 How long ago: \_\_\_\_\_ months, \_\_\_\_\_ weeks

697

698 Cue-words: \_\_\_\_\_

699

700

701 Happy memory 5 How long ago: \_\_\_\_\_ months, \_\_\_\_\_ weeks

702

703 Cue-words: \_\_\_\_\_

704

705

706

707 SAD MEMORIES

---

708 Choose five memories of events that you unmistakably experience as **sad**. For each memory, write  
709 down **three cue words** that can help you to recall the memory. It is important that the event  
710 happened **at least one day ago** and **at most five years ago**.

711

712

713 Sad memory 1 How long ago: \_\_\_\_\_ months, \_\_\_\_\_ weeks

714

715 Cue-words: \_\_\_\_\_

716

717

718 Sad memory 2 How long ago: \_\_\_\_\_ months, \_\_\_\_\_ weeks

719

720 Cue-words: \_\_\_\_\_

721

722

723 Sad memory 3 How long ago: \_\_\_\_\_ months, \_\_\_\_\_ weeks

724

725 Cue-words: \_\_\_\_\_

726

727

728 Sad memory 4 How long ago: \_\_\_\_\_ months, \_\_\_\_\_ weeks

729

730 Cue-words: \_\_\_\_\_

731

732

733 Sad memory 5 How long ago: \_\_\_\_\_ months, \_\_\_\_\_ weeks

734

735 Cue-words: \_\_\_\_\_

736

737

738

739

740

741

742

743

744

745

746 NEUTRAL MEMORIES

---

747 Choose five memories of events that you unmistakably experience as **neutral**. For each memory, write  
748 down **three cue words** that can help you to recall the memory. It is important that the event  
749 happened **at least one day ago** and **at most five years ago**.

750

751 Neutral memory 1 How long ago: \_\_\_\_\_ months, \_\_\_\_\_ weeks

752

753 Cue-words: \_\_\_\_\_

754

755 Neutral memory 2 How long ago: \_\_\_\_\_ months, \_\_\_\_\_ weeks

756

757 Cue-words: \_\_\_\_\_

758

759 Neutral memory 3 How long ago: \_\_\_\_\_ months, \_\_\_\_\_ weeks

760

761 Cue-words: \_\_\_\_\_

762

763

764

765

766

## SUPPLEMENTARY NOTE 11:

767

## MOVIE CLIP DESCRIPTIONS

768

769 **Supplementary table 17.** Movie clip descriptions.

770

| <b>condition</b> | <b>movie</b>                                                                                                     | <b>scene description</b>                                                                                                                                                                                                                                                                   | <b>approx.<br/>time in<br/>movie</b> | <b>duration</b> |
|------------------|------------------------------------------------------------------------------------------------------------------|--------------------------------------------------------------------------------------------------------------------------------------------------------------------------------------------------------------------------------------------------------------------------------------------|--------------------------------------|-----------------|
| positive         | <b>Marley and Me</b><br><br>Rosenfelt, K.<br>(producer), &<br>Frankel, D.<br>(director).<br>(2008).              | Labrador Marley and John are at the beach. John is talking to Marley about life. He lets Marley off the leash against orders to play in the water. Marley enjoys his freedom and other dog owners release their dogs as well. They have a great time.                                      | 1:12:15                              | 115<br>seconds  |
|                  | <b>Untouchable</b><br><br>Duval, N.,<br>(producer), &<br>Nakache, O.<br>Toledano, É .<br>(directors).<br>(2011). | Philippe takes Driss paragliding. Driss refuses at first, but joins Philippe reluctantly. In the end, he is thrilled and enjoys it.                                                                                                                                                        | 1:20:25                              | 156<br>seconds  |
| negative         | <b>Secret in Their Eyes</b><br><br>Jackson, M.,<br>(producer), &<br>Ray, B.<br>(director).<br>(2015).            | Jess, Ray, Bumpy and their colleague arrive at a crime scene in an underground carpark. A policeman shows Ray the corpse in a dumpster. Ray slowly walks to Jess, and tells her that it is her daughter. She runs to the dumpster, climbs in, holds her daughter and is crying in despair. | 53:45                                | 192<br>seconds  |
|                  | <b>The Impossible</b><br><br>Augustin, Á.,<br>(producer), &<br>Bayona, J. A.<br>(director).<br>(2012).           | A man calls home after a tsunami, saying that he cannot find his wife or children.                                                                                                                                                                                                         | 1:01:37                              | 147<br>seconds  |
| neutral          | <b>Dead Poet Society</b>                                                                                         | Teachers and students are in the dining hall for lunch. A teacher, Mr. McAllister, talks                                                                                                                                                                                                   | 26:50                                | 105<br>seconds  |

|                                                                                                             |                                                                                                                                                                                                                                                                  |       |                |
|-------------------------------------------------------------------------------------------------------------|------------------------------------------------------------------------------------------------------------------------------------------------------------------------------------------------------------------------------------------------------------------|-------|----------------|
| Haft, S.<br>(producer), &<br>Weir, P.<br>(director). (1989)                                                 | to Mr. Keating about his<br>teaching style. Neil found Mr.<br>Keating's old yearbook and<br>shows it to Richard and other<br>students.                                                                                                                           |       |                |
| <b>Big Night</b><br><br>Kirkpatrick, D.<br>(producer), &<br>Scott, C., Tucci,<br>S. (directors).<br>(1996). | Secundo and Primo are<br>cooking in a big kitchen. Their<br>waiter, Cristiano, joins and<br>wants to get water from the<br>sink, but it is broken. Secundo<br>leaves the kitchen, prepares the<br>restaurant for the guests and<br>opens the restaurant's doors. | 02:00 | 164<br>seconds |

771

772

773

774



775  
776  
777

## SUPPLEMENTARY NOTE 12: BLINDING

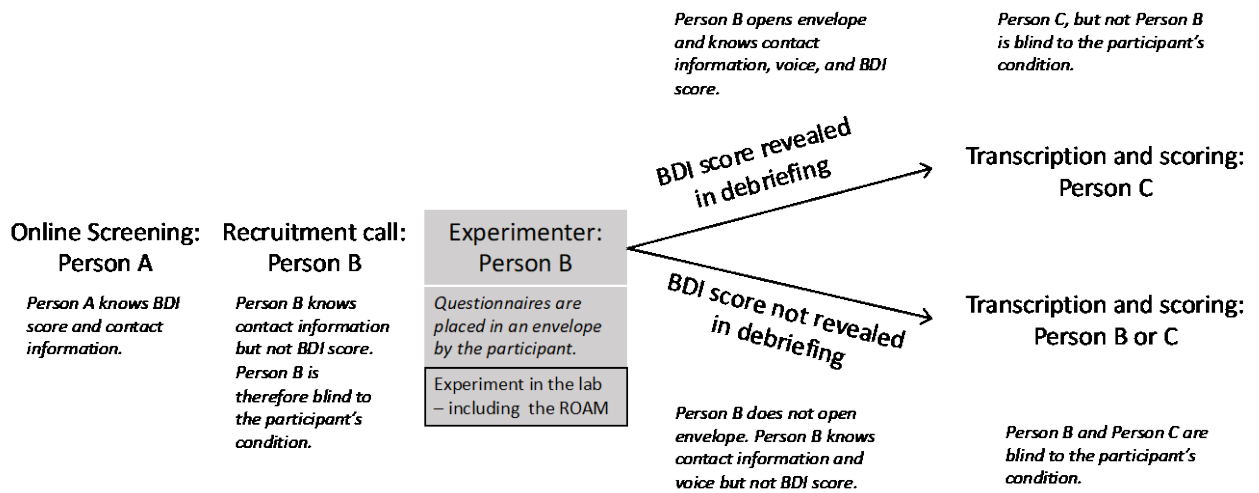

778  
779  
780  
781  
782

**Supplementary Fig. 10 Overview of the procedure to ensure blinding.** One person responsible for the online screening also transcribed and coded several memories. For that person (initials: RB), the memories were anonymized prior to transcription and coding.

783 SUPPLEMENTARY NOTE 13:  
784 DESIGN TABLES  
785

786 OVERVIEW OF DESIGN TABLES

787 • **Design Table 1: Manipulation checks**

- 788 ○ Zygomaticus activity during positive memory recall
  - 789 ■ Manipulation check 1.1: Do participants without dysphoria smile when
  - 790 remembering positive memories?
  - 791 ■ Manipulation check 1.2: Do participants without dysphoria smile more when
  - 792 remembering positive memories compared to neutral memories?
- 793 ○ Corrugator activity during negative memory recall
  - 794 ■ Manipulation check 2.1: Do participants without dysphoria frown when
  - 795 remembering negative memories?
  - 796 ■ Manipulation check 2.2: Do participants without dysphoria frown more
  - 797 when remembering negative memories compared to neutral memories?

798 • **Design Table 2: Confirmatory analyses – Test 1 – episodic detail**

- 799 ○ Which theory best explains episodic memory distortions in dysphoria?

800 • **Design Table 3: Confirmatory analyses – Test 2A and 2B – affective responses**

- 801 ○ Test 2A: Which theory best explains affective memory distortions in dysphoria?
- 802 ○ Test 2B: Domain-specificity of affective responses: Are the distorted affective
- 803 responses to autobiographical memories specific to memories or already present
- 804 during the encoding of events?

805 • **Design Table 4: Confirmatory analyses – Test 3 – relationship of episodic detail and**  
806 **affective responses**

- 807 ○ Positive memories
  - 808 ■ Test 3.1A: Does the amount of retrieved episodic detail predict affective
  - 809 responses to positive memories among individuals with and without
  - 810 dysphoria?
  - 811 ■ Test 3.1B: Does the within-participant relationship between episodic detail
  - 812 and affective responses differ between individuals with and without
  - 813 dysphoria?
- 814 ○ Negative memories
  - 815 ■ Test 3.2A: Does the amount of retrieved episodic detail predict affective
  - 816 responses to negative memories among individuals with and without
  - 817 dysphoria?
  - 818 ■ Test 3.2B: Does the within-participant relationship between episodic detail
  - 819 and affective responses differ between individuals with and without
  - 820 dysphoria?

| Question                                                                                                                             | Hypothesis                                                                                                                                                                   | Outcome measures                                         | Sampling plan (e.g. power analysis)                                                 | Analysis Plan                                                                                                                                                                                                                                                                                                                                                                                                                                                                                                                                                                    | Interpretation given to different outcomes                                                                                                                                                                                                                                                         | Outcome                                                                                                                                                                                                                                                                                                                               |
|--------------------------------------------------------------------------------------------------------------------------------------|------------------------------------------------------------------------------------------------------------------------------------------------------------------------------|----------------------------------------------------------|-------------------------------------------------------------------------------------|----------------------------------------------------------------------------------------------------------------------------------------------------------------------------------------------------------------------------------------------------------------------------------------------------------------------------------------------------------------------------------------------------------------------------------------------------------------------------------------------------------------------------------------------------------------------------------|----------------------------------------------------------------------------------------------------------------------------------------------------------------------------------------------------------------------------------------------------------------------------------------------------|---------------------------------------------------------------------------------------------------------------------------------------------------------------------------------------------------------------------------------------------------------------------------------------------------------------------------------------|
| <b>Zygomaticus Manipulation check 1.1:</b><br><br><b>Do participants without dysphoria smile when remembering positive memories?</b> | <b>Manipulation check 1.1 – Hypothesis 1:</b><br><br>Individuals without dysphoria smile more when reliving positive memories than during baseline.<br>$\gamma_2 > \gamma_1$ | Zygomaticus major activity prior to baseline-correction. | The sampling plan is not determined by the manipulation check but by Test 1 and 2A. | We will employ Bayesian Informative Hypothesis Testing (BAIT) <sup>63</sup> which allows to test evidence for multiple hypotheses simultaneously. Only data for positive memories are included in this analysis. Analyses will be performed in three steps.<br><br>First, we will estimate a simple multilevel model that includes the dependent variable of interest, fixed effects for the predictors of interest, and a random intercept for participant to account for the within-participants design. The affective response of participant <i>i</i> to memory <i>j</i> is: | The manipulation with regard to positive autobiographical memory retrieval was successful. Individuals without dysphoria smile when they remember positive memories. It is possible to investigate the psychophysiological expression of positive affect during autobiographical memory retrieval. | Hypothesis 1 was confirmed.<br><br>The manipulation with regard to positive autobiographical memory retrieval was successful. Individuals without dysphoria smile when they remember positive memories. It is possible to investigate the psychophysiological expression of positive affect during autobiographical memory retrieval. |
|                                                                                                                                      | <b>Manipulation check 1.1 – Hypothesis 2:</b><br><br>Individuals without dysphoria smile less when reliving positive memories than during baseline.<br>$\gamma_2 < \gamma_1$ |                                                          |                                                                                     |                                                                                                                                                                                                                                                                                                                                                                                                                                                                                                                                                                                  | The manipulation was not successful. Individuals without dysphoria smile less when remembering positive memories than during baseline. It is not possible to investigate the psychophysiological expression of positive affect during                                                              |                                                                                                                                                                                                                                                                                                                                       |

|  |                                                                                                                                                                                                        |  |  |                                                                                                                                                                                                                                                                                                                                                                                                                                                                                                                                                                                                                                                                                                                                                              |                                                                                                                                                                                                                                                                                        |  |
|--|--------------------------------------------------------------------------------------------------------------------------------------------------------------------------------------------------------|--|--|--------------------------------------------------------------------------------------------------------------------------------------------------------------------------------------------------------------------------------------------------------------------------------------------------------------------------------------------------------------------------------------------------------------------------------------------------------------------------------------------------------------------------------------------------------------------------------------------------------------------------------------------------------------------------------------------------------------------------------------------------------------|----------------------------------------------------------------------------------------------------------------------------------------------------------------------------------------------------------------------------------------------------------------------------------------|--|
|  |                                                                                                                                                                                                        |  |  | $\text{affective\_response}_{ij} = \gamma_1(\text{time})_{1i} + \gamma_2(\text{time})_{2i} + \varepsilon_{ij} + U_i$                                                                                                                                                                                                                                                                                                                                                                                                                                                                                                                                                                                                                                         | autobiographical memory retrieval.                                                                                                                                                                                                                                                     |  |
|  | <p><b>Manipulation check 1.1 – Null Hypothesis :</b></p> <p>Individuals without dysphoria smile equally when reliving positive memories and during baseline.<br/> <math>\gamma_2 = \gamma_1</math></p> |  |  | <p>With:<br/> <math>(\text{time})_{1i} = 1</math> if baseline<br/> <math>(\text{time})_{1i} = 0</math> if recall<br/> <math>(\text{time})_{2i} = 0</math> if baseline<br/> <math>(\text{time})_{2i} = 1</math> if recall</p> <p><i>affective_response</i> represents zygomaticus activity, prior to transforming it into percentage change from baseline. The residual is indicated by <math>\varepsilon_{ij}</math>. <i>(time)</i> represents the factor baseline versus recall. <math>U_i</math> represents a random intercept of a participant.</p> <p>Second, we will extract the estimated effects of <i>(time)</i> from the multilevel model as well as the variance-covariance matrix of these effects.</p> <p>Third, the estimates and variance-</p> | <p>The manipulation was not successful. Individuals without dysphoria smile equally when they remember positive memories compared to a baseline. It is not possible to investigate the psychophysiological expression of positive affect during autobiographical memory retrieval.</p> |  |

|  |  |  |  |                                                                                                                                                                                                                                                                                                                                                                                                                                                                                                                                                                                                                                                                                                                                                                                                                                                                         |  |  |
|--|--|--|--|-------------------------------------------------------------------------------------------------------------------------------------------------------------------------------------------------------------------------------------------------------------------------------------------------------------------------------------------------------------------------------------------------------------------------------------------------------------------------------------------------------------------------------------------------------------------------------------------------------------------------------------------------------------------------------------------------------------------------------------------------------------------------------------------------------------------------------------------------------------------------|--|--|
|  |  |  |  | <p>covariance matrices will be used to evaluate the evidence for each hypothesis with BAIT. For each analysis, we will calculate the effective sample size that accounts for multiple observations within participants. We will conduct all analyses with the default settings implemented in the bain package<sup>63</sup> with the exception that we will use a moderate fraction = 2 of the data to define the prior variance. We conduct sensitivity analyses with a more conservative fraction = 1 and a more liberal fraction = 3 to evaluate the influence of the prior variance on our results<sup>63</sup>. Evidence will be presented as Bayes Factors (BF) and Posterior Model Probabilities (PostP). The dependent variable is zygomaticus activity in positive memory trials, prior to baseline-correction.</p> <p><math>\gamma_1</math> = individuals</p> |  |  |
|--|--|--|--|-------------------------------------------------------------------------------------------------------------------------------------------------------------------------------------------------------------------------------------------------------------------------------------------------------------------------------------------------------------------------------------------------------------------------------------------------------------------------------------------------------------------------------------------------------------------------------------------------------------------------------------------------------------------------------------------------------------------------------------------------------------------------------------------------------------------------------------------------------------------------|--|--|

|                                                                                                                                                                         |                                                                                                                                                                                                          |                                                                      |                                                                                                        |                                                                                                                                                                                                                                                                                                                                                                                                                                                                                                                                                                                                                                                                     |                                                                                                                                                                                                  |                                                                                                                                                                             |
|-------------------------------------------------------------------------------------------------------------------------------------------------------------------------|----------------------------------------------------------------------------------------------------------------------------------------------------------------------------------------------------------|----------------------------------------------------------------------|--------------------------------------------------------------------------------------------------------|---------------------------------------------------------------------------------------------------------------------------------------------------------------------------------------------------------------------------------------------------------------------------------------------------------------------------------------------------------------------------------------------------------------------------------------------------------------------------------------------------------------------------------------------------------------------------------------------------------------------------------------------------------------------|--------------------------------------------------------------------------------------------------------------------------------------------------------------------------------------------------|-----------------------------------------------------------------------------------------------------------------------------------------------------------------------------|
|                                                                                                                                                                         |                                                                                                                                                                                                          |                                                                      |                                                                                                        | <p>without dysphoria:<br/>zygomaticus activity<br/>during baseline;<br/><math>\gamma_2</math> = individuals<br/>without dysphoria:<br/>zygomaticus activity<br/>during memory<br/>retrieval</p> <p>Since individuals with<br/>dysphoria are expected<br/>to experience affective<br/>memory distortions,<br/>the effectiveness of our<br/>manipulation will only<br/>be evaluated within the<br/>non-dysphoric group.<br/>However, we will<br/>conduct the same<br/>analyses within the<br/>dysphoric group to<br/>draw a comprehensive<br/>picture of how<br/>individuals with and<br/>without dysphoria re-<br/>experience<br/>autobiographical<br/>memories.</p> |                                                                                                                                                                                                  |                                                                                                                                                                             |
| <p><b>Zygomaticus<br/>Manipulation check<br/>1.2:</b></p> <p><b>Do participants<br/>without dysphoria<br/>smile more when<br/>remembering<br/>positive memories</b></p> | <p><b>Manipulation check<br/>1.2 – Hypothesis 1:</b></p> <p>Individuals without<br/>dysphoria smile more<br/>when reliving<br/>positive memories<br/>than when<br/>remembering neutral<br/>memories.</p> | <p>Zygomaticus major<br/>activity after baseline<br/>correction.</p> | <p>The sampling plan is<br/>not determined by the<br/>manipulation check<br/>but by Test 1 and 2A.</p> | <p>We will employ<br/>Bayesian Informative<br/>Hypothesis Testing<br/>(BAIT)<sup>63</sup>. Only data of<br/>positive and neutral<br/>memories are included<br/>in this analysis. We<br/>will use a similar three<br/>step procedure as in</p>                                                                                                                                                                                                                                                                                                                                                                                                                       | <p>The manipulation<br/>was successful.<br/>Smiling during<br/>memory retrieval is<br/>specific for positive<br/>memories. It is<br/>possible to<br/>investigate the<br/>psychophysiological</p> | <p>Hypothesis 1 was<br/>confirmed.</p> <p>The manipulation<br/>was successful.<br/>Smiling during<br/>memory retrieval is<br/>specific for positive<br/>memories. It is</p> |

|                                             |                                                                                                                                                                                                    |  |  |                                                                                                                                                                                                                                                                                                                                                                                                                                                                                                                                                                                                                                                                                                                                                                                                                        |                                                                                |                                                                                                                                |
|---------------------------------------------|----------------------------------------------------------------------------------------------------------------------------------------------------------------------------------------------------|--|--|------------------------------------------------------------------------------------------------------------------------------------------------------------------------------------------------------------------------------------------------------------------------------------------------------------------------------------------------------------------------------------------------------------------------------------------------------------------------------------------------------------------------------------------------------------------------------------------------------------------------------------------------------------------------------------------------------------------------------------------------------------------------------------------------------------------------|--------------------------------------------------------------------------------|--------------------------------------------------------------------------------------------------------------------------------|
| <p><b>compared to neutral memories?</b></p> | $\gamma_2 > \gamma_1$                                                                                                                                                                              |  |  | <p>manipulation check 1, with the exception that (<i>time</i>) is replaced by (<i>condition</i>) with the levels positive and neutral.</p> <p>affective_response<sub>ij</sub> is the percentage change of zygomaticus activity from baseline:</p> <p>affective_response<sub>ij</sub> = <math>\gamma_1(cond)_{1i} + \gamma_2(cond)_{2i} + \epsilon_{ij} + U_i</math></p> <p>With:<br/> <math>(cond)_{1i} = 1</math> if positive<br/> <math>(cond)_{1i} = 0</math> if neutral<br/> <math>(cond)_{2i} = 0</math> if positive<br/> <math>(cond)_{2i} = 1</math> if neutral</p> <p><math>\gamma_1</math> = individuals without dysphoria: baseline-corrected zygomaticus activity during positive memory retrieval;<br/> <math>\gamma_2</math> = individuals without dysphoria: baseline-corrected zygomaticus activity</p> | <p>expression of positive affect during autobiographical memory retrieval.</p> | <p>possible to investigate the psychophysiological expression of positive affect during autobiographical memory retrieval.</p> |
|                                             | <p><b>Manipulation check 1.2 – Hypothesis 2:</b></p> <p>Individuals without dysphoria smile less when reliving positive memories than when remembering neutral memories.</p> $\gamma_2 < \gamma_1$ |  |  | <p>The manipulation was not successful. It is not possible to investigate the psychophysiological expression of positive affect during autobiographical memory retrieval.</p>                                                                                                                                                                                                                                                                                                                                                                                                                                                                                                                                                                                                                                          |                                                                                |                                                                                                                                |
|                                             | <p><b>Manipulation check 1.2 – Null Hypothesis :</b></p> <p>Individuals without dysphoria smile equally when reliving positive memories and neutral memories.</p> $\gamma_2 = \gamma_1$            |  |  | <p>The manipulation was not successful. Smiling during memory retrieval is not specific for positive memories. It is not possible to investigate the psychophysiological expression of positive affect during autobiographical memory retrieval.</p>                                                                                                                                                                                                                                                                                                                                                                                                                                                                                                                                                                   |                                                                                |                                                                                                                                |

|                                                                                                                                            |                                                                                                                                                                                                     |                                                                     |                                                                                            |                                                                                                                                                                                                                                                                                                                                                                                                                                   |                                                                                                                                                                                                                                                              |                                                                                                                                                                                                                                        |
|--------------------------------------------------------------------------------------------------------------------------------------------|-----------------------------------------------------------------------------------------------------------------------------------------------------------------------------------------------------|---------------------------------------------------------------------|--------------------------------------------------------------------------------------------|-----------------------------------------------------------------------------------------------------------------------------------------------------------------------------------------------------------------------------------------------------------------------------------------------------------------------------------------------------------------------------------------------------------------------------------|--------------------------------------------------------------------------------------------------------------------------------------------------------------------------------------------------------------------------------------------------------------|----------------------------------------------------------------------------------------------------------------------------------------------------------------------------------------------------------------------------------------|
|                                                                                                                                            |                                                                                                                                                                                                     |                                                                     |                                                                                            | <p>during neutral memory retrieval</p> <p>Since individuals with dysphoria are expected to experience affective memory distortions, the effectiveness of our manipulation will only be evaluated within the non-dysphoric group. However, we will conduct the same analyses within the dysphoric group to draw a comprehensive picture of how individuals with and without dysphoria re-experience autobiographical memories.</p> |                                                                                                                                                                                                                                                              |                                                                                                                                                                                                                                        |
| <p><b>Corrugator Manipulation check 2.1:</b></p> <p><b>Do participants without dysphoria frown when remembering negative memories?</b></p> | <p><b>Manipulation check 2.1 – Hypothesis 1:</b></p> <p>Individuals without dysphoria frown more when reliving positive memories than during baseline.<br/> <math>\gamma_2 &gt; \gamma_1</math></p> | <p>Corrugator supercilii activity prior to baseline correction.</p> | <p>The sampling plan is not determined by the manipulation check but by Test 1 and 2A.</p> | <p>Similar analysis plan to Manipulation check 1.1, with the exception that <i>affective_response</i> represents corrugator activity instead of zygomaticus activity. Only data for negative memories are included in this analysis.</p> <p><math>\gamma_1</math> = individuals without dysphoria: baseline-corrected</p>                                                                                                         | <p>The manipulation with regard to negative autobiographical memory was successful. Individuals without dysphoria frown when they remember negative memories. It is possible to investigate the psychophysiological expression of negative affect during</p> | <p>Hypothesis 1 was confirmed.</p> <p>The manipulation with regard to negative autobiographical memory was successful. Individuals without dysphoria frown when they remember negative memories. It is possible to investigate the</p> |



|  |                                                                                                                                                                                                       |  |  |                                                                                                                                                                                                                                                                                                                                                                                        |                                                                                                                                                                                                                                                                                 |                                                                                             |
|--|-------------------------------------------------------------------------------------------------------------------------------------------------------------------------------------------------------|--|--|----------------------------------------------------------------------------------------------------------------------------------------------------------------------------------------------------------------------------------------------------------------------------------------------------------------------------------------------------------------------------------------|---------------------------------------------------------------------------------------------------------------------------------------------------------------------------------------------------------------------------------------------------------------------------------|---------------------------------------------------------------------------------------------|
|  |                                                                                                                                                                                                       |  |  | corrugator activity during baseline;<br>$\gamma_2$ = individuals without dysphoria: baseline-corrected corrugator activity during memory retrieval                                                                                                                                                                                                                                     | autobiographical memory retrieval.                                                                                                                                                                                                                                              | psychophysiological expression of negative affect during autobiographical memory retrieval. |
|  | <p><b>Manipulation check 2.1 – Hypothesis 2:</b></p> <p>Individuals without dysphoria frown less when reliving positive memories than during baseline.<br/><math>\gamma_2 &lt; \gamma_1</math></p>    |  |  | Since individuals without dysphoria are expected to experience emotional memory distortions, the effectiveness of our manipulation will only be evaluated within the non-dysphoric group. However, we will conduct the same analyses within the dysphoric group to draw a comprehensive picture of how individuals with and without dysphoria re-experience autobiographical memories. | The manipulation was not successful. Individuals without dysphoria frown less when remembering negative memories than during baseline. It is not possible to investigate the psychophysiological expression of negative affect during autobiographical memory retrieval.        |                                                                                             |
|  | <p><b>Manipulation check 2.1 – Null Hypothesis :</b></p> <p>Individuals without dysphoria frown equally when reliving positive memories and during baseline.<br/><math>\gamma_2 = \gamma_1</math></p> |  |  |                                                                                                                                                                                                                                                                                                                                                                                        | The manipulation was not successful. Individuals without dysphoria frown equally when they remember negative memories compared to a baseline. It is not possible to investigate the psychophysiological expression of negative affect during autobiographical memory retrieval. |                                                                                             |

|                                                                                                                                                                              |                                                                                                                                                                                                                         |                                                                  |                                                                                            |                                                                                                                                                                                                                                                                                    |                                                                                                                                                                                                                                           |                                                                                                                                                                                                                                                                              |                                                                                                                                                                                                                                                                           |                                                                                                                                                                                                                    |
|------------------------------------------------------------------------------------------------------------------------------------------------------------------------------|-------------------------------------------------------------------------------------------------------------------------------------------------------------------------------------------------------------------------|------------------------------------------------------------------|--------------------------------------------------------------------------------------------|------------------------------------------------------------------------------------------------------------------------------------------------------------------------------------------------------------------------------------------------------------------------------------|-------------------------------------------------------------------------------------------------------------------------------------------------------------------------------------------------------------------------------------------|------------------------------------------------------------------------------------------------------------------------------------------------------------------------------------------------------------------------------------------------------------------------------|---------------------------------------------------------------------------------------------------------------------------------------------------------------------------------------------------------------------------------------------------------------------------|--------------------------------------------------------------------------------------------------------------------------------------------------------------------------------------------------------------------|
| <p><b>Corrugator Manipulation check 2.2:</b></p> <p><b>Do participants without dysphoria frown more when remembering negative memories compared to neutral memories?</b></p> | <p><b>Manipulation check 2.2 – Hypothesis 1:</b></p> <p>Individuals without dysphoria frown more when reliving negative memories than when remembering neutral memories.</p> <p><math>\gamma_2 &gt; \gamma_1</math></p> | <p>Corrugator supercilii activity after baseline correction.</p> | <p>The sampling plan is not determined by the manipulation check but by Test 1 and 2A.</p> | <p>Similar analysis plan to Manipulation check 1.2, with the exception that <i>affective_response</i> represents the percentage change from baseline of corrugator instead of zygomaticus activity. Only data for negative and neutral memories are included in this analysis.</p> | <p>The manipulation was successful. Frowning during memory retrieval is specific for negative memories. It is possible to investigate the psychophysiological expression of negative affect during autobiographical memory retrieval.</p> | <p>Hypothesis 1 was confirmed.</p> <p>The manipulation was successful. Frowning during memory retrieval is specific for negative memories. It is possible to investigate the psychophysiological expression of negative affect during autobiographical memory retrieval.</p> |                                                                                                                                                                                                                                                                           |                                                                                                                                                                                                                    |
|                                                                                                                                                                              | <p><b>Manipulation check 2.2 – Hypothesis 2:</b></p> <p>Individuals without dysphoria frown less when reliving negative memories than when remembering neutral memories.</p> <p><math>\gamma_2 &lt; \gamma_1</math></p> |                                                                  |                                                                                            |                                                                                                                                                                                                                                                                                    |                                                                                                                                                                                                                                           |                                                                                                                                                                                                                                                                              | <p><math>\gamma_1</math> = individuals without dysphoria: baseline-corrected corrugator activity during negative memory retrieval;<br/> <math>\gamma_2</math> = individuals without dysphoria: baseline-corrected corrugator activity during neutral memory retrieval</p> | <p>The manipulation was not successful. It is not possible to investigate the psychophysiological expression of negative affect during autobiographical memory retrieval.</p>                                      |
|                                                                                                                                                                              | <p><b>Manipulation check 2.2 – Null Hypothesis:</b></p> <p>Individuals without dysphoria frown equally when reliving negative memories and neutral memories.</p> <p><math>\gamma_2 = \gamma_1</math></p>                |                                                                  |                                                                                            |                                                                                                                                                                                                                                                                                    |                                                                                                                                                                                                                                           |                                                                                                                                                                                                                                                                              | <p>Since individuals with dysphoria are expected to experience emotional memory distortions, the effectiveness of our manipulation will only be evaluated within the non-dysphoric group. However, we will conduct the same analyses within the</p>                       | <p>The manipulation was not successful. Frowning during memory retrieval is not specific for negative memories. It is not possible to investigate the psychophysiological expression of negative affect during</p> |

|  |  |  |  |                                                                                                                                        |                                    |  |
|--|--|--|--|----------------------------------------------------------------------------------------------------------------------------------------|------------------------------------|--|
|  |  |  |  | dysphoric group to draw a comprehensive picture of how individuals with and without dysphoria re-experience autobiographical memories. | autobiographical memory retrieval. |  |
|--|--|--|--|----------------------------------------------------------------------------------------------------------------------------------------|------------------------------------|--|

823  
824

| Question                                                                                                                   | Hypothesis                                                                                                                                                                                                                                                                                                                          | Outcome measures               | Sampling plan (e.g. power analysis)                                                                                                                                                                                                                                                                                                                                                                                                                                                                                                                                                                                                                                          | Analysis Plan                                                                                                                                                                                                                                                                                                                                                                | Interpretation given to different outcomes                                                                 | Outcome                                                                                                                              |
|----------------------------------------------------------------------------------------------------------------------------|-------------------------------------------------------------------------------------------------------------------------------------------------------------------------------------------------------------------------------------------------------------------------------------------------------------------------------------|--------------------------------|------------------------------------------------------------------------------------------------------------------------------------------------------------------------------------------------------------------------------------------------------------------------------------------------------------------------------------------------------------------------------------------------------------------------------------------------------------------------------------------------------------------------------------------------------------------------------------------------------------------------------------------------------------------------------|------------------------------------------------------------------------------------------------------------------------------------------------------------------------------------------------------------------------------------------------------------------------------------------------------------------------------------------------------------------------------|------------------------------------------------------------------------------------------------------------|--------------------------------------------------------------------------------------------------------------------------------------|
| <p><b>Test 1 - episodic detail:</b></p> <p><b>Which theory best explains episodic memory distortions in dysphoria?</b></p> | <p><b>Hypothesis 1: Overgeneral memory bias</b></p> <p>Individuals with dysphoria retrieve fewer episodic detail when reliving positive memories and when reliving negative memories compared to individuals without dysphoria.<br/> <math>\gamma_1 &lt; \gamma_3</math> &amp; <math>\gamma_2 &lt; \gamma_4</math></p>              | <p>Episodic memory detail.</p> | <p>We will collect data until there is strong evidence for one hypothesis (<math>\text{Post}P_i \geq .80</math>) or when we reach a maximum sample size of <math>N=80</math>. We will commence by including a minimum of 20 participants per group (<math>N=40</math>) and computing Posterior Model Probabilities for Test 1 and Test 2A. If there is convincing evidence for a specific hypothesis within both tests (<math>\text{Post}P_i \geq .80</math>), we will stop data collection. Otherwise, we will increase the sample size in incremental steps of <math>N=10</math> (5 per group) and repeat the <math>\text{BF}_{ac}</math> testing procedure each time.</p> | <p>We will employ Bayesian Informative Hypothesis Testing (BAIT)<sup>63</sup>. Analyses will be performed in three steps.</p> <p>First, we will estimate a simple multilevel model that includes the dependent variable of interest, fixed effects for the predictors of interest, and a random intercept for participant to account for the within-participants design.</p> | <p>An overgeneral memory bias best explains episodic memory distortions in individuals with dysphoria.</p> | <p>Hypothesis 2 was confirmed.</p> <p>A negativity bias best explains episodic memory distortions in individuals with dysphoria.</p> |
|                                                                                                                            | <p><b>Hypothesis 2: Negativity bias</b></p> <p>Individuals with dysphoria retrieve fewer episodic detail when reliving positive memories but more episodic detail when reliving negative memories compared to individuals without dysphoria.<br/> <math>\gamma_1 &lt; \gamma_3</math> &amp; <math>\gamma_2 &gt; \gamma_4</math></p> |                                |                                                                                                                                                                                                                                                                                                                                                                                                                                                                                                                                                                                                                                                                              | <p>The episodic detail of participant <math>i</math> of memory <math>j</math> is:</p> $\text{episodic\_detail}_{ij} = \gamma_1(\text{group\_cond})_{1i} + \gamma_2(\text{group\_cond})_{2i} + \gamma_3(\text{group\_cond})_{3i} + \gamma_4(\text{group\_cond})_{4i} + \varepsilon_{ij} + U_i$ <p>If dysphoric, positive memory:</p>                                          | <p>A negativity bias best explains episodic memory distortions in individuals with dysphoria.</p>          |                                                                                                                                      |

|  |                                                                                                                                                                                                                                                                                                   |  |                                                                                                                       |                                                                                                                                                                                                                                                                                                                                                                                                                                                                                                                                                                                                                                                                                                                                                                                                                                                                       |                                                                                                                                                    |  |
|--|---------------------------------------------------------------------------------------------------------------------------------------------------------------------------------------------------------------------------------------------------------------------------------------------------|--|-----------------------------------------------------------------------------------------------------------------------|-----------------------------------------------------------------------------------------------------------------------------------------------------------------------------------------------------------------------------------------------------------------------------------------------------------------------------------------------------------------------------------------------------------------------------------------------------------------------------------------------------------------------------------------------------------------------------------------------------------------------------------------------------------------------------------------------------------------------------------------------------------------------------------------------------------------------------------------------------------------------|----------------------------------------------------------------------------------------------------------------------------------------------------|--|
|  |                                                                                                                                                                                                                                                                                                   |  | <p>At <math>N=80</math>, the results will be reported regardless of the strength of evidence for each hypothesis.</p> | <p><math>(group\_cond)_{1i} = 1</math><br/>else<br/><math>(group\_cond)_{1i} = 0</math></p> <p>If dysphoric, negative memory:<br/><math>(group\_cond)_{2i} = 1</math><br/>else<br/><math>(group\_cond)_{2i} = 0</math></p> <p>If non-dysphoric, positive memory:<br/><math>(group\_cond)_{3i} = 1</math><br/>else<br/><math>(group\_cond)_{3i} = 0</math></p> <p>If non-dysphoric, negative memory:<br/><math>(group\_cond)_{4i} = 1</math><br/>else<br/><math>(group\_cond)_{4i} = 0</math></p> <p>The residual is indicated by <math>\epsilon_{ij}</math>. <math>U_i</math> represents a random intercept of a participant.</p> <p>Second, we will extract the estimated effects of interest from the multilevel model as well as the variance-covariance matrix of these effects.</p> <p>Third, the estimates and variance-covariance matrices will be used to</p> |                                                                                                                                                    |  |
|  | <p><b>Hypothesis 0:<br/>Null hypothesis</b></p> <p>Individuals with dysphoria retrieve the same amount of episodic detail when reliving positive and negative memories compared to individuals without dysphoria.<br/><math>\gamma_1 = \gamma_3</math> &amp; <math>\gamma_2 = \gamma_4</math></p> |  |                                                                                                                       |                                                                                                                                                                                                                                                                                                                                                                                                                                                                                                                                                                                                                                                                                                                                                                                                                                                                       | <p>There are no differences in retrieved episodic detail during autobiographical memory recall between individuals with and without dysphoria.</p> |  |
|  | <p><b>Complement hypothesis:<br/>Fail safe</b></p> <p>None of the other hypotheses explains the data well.</p>                                                                                                                                                                                    |  |                                                                                                                       |                                                                                                                                                                                                                                                                                                                                                                                                                                                                                                                                                                                                                                                                                                                                                                                                                                                                       | <p>None of the above hypotheses explains the data well. In this case, exploratory analyses allow to generate hypotheses for future research.</p>   |  |

|  |  |  |  |                                                                                                                                                                                                                                                                                                                                                                                                                                                                                                                                                                                                                                                                                                                                                                                                                                                                                                                                                           |  |  |
|--|--|--|--|-----------------------------------------------------------------------------------------------------------------------------------------------------------------------------------------------------------------------------------------------------------------------------------------------------------------------------------------------------------------------------------------------------------------------------------------------------------------------------------------------------------------------------------------------------------------------------------------------------------------------------------------------------------------------------------------------------------------------------------------------------------------------------------------------------------------------------------------------------------------------------------------------------------------------------------------------------------|--|--|
|  |  |  |  | <p>evaluate the evidence for each hypothesis with BAIT. For each analysis, we will calculate the effective sample size that accounts for multiple observations within participants. We will conduct all analyses with the default settings implemented in the bain package<sup>63</sup> with the exception that we will use a moderate fraction = 2 of the data to define the prior variance. We conduct sensitivity analyses with a more conservative fraction = 1 and a more liberal fraction = 3 to evaluate the influence of the prior variance on our results<sup>63</sup>. Evidence will be presented as Bayes Factors (BF) and Posterior Model Probabilities (PostP). The dependent variable is the amount of episodic detail that is retrieved while reliving autobiographical memories.</p> <p><math>\gamma_1</math> = individuals with dysphoria: positive memories; <math>\gamma_2</math> = individuals with dysphoria: negative memories;</p> |  |  |
|--|--|--|--|-----------------------------------------------------------------------------------------------------------------------------------------------------------------------------------------------------------------------------------------------------------------------------------------------------------------------------------------------------------------------------------------------------------------------------------------------------------------------------------------------------------------------------------------------------------------------------------------------------------------------------------------------------------------------------------------------------------------------------------------------------------------------------------------------------------------------------------------------------------------------------------------------------------------------------------------------------------|--|--|

|  |  |  |  |                                                                                                                              |  |  |
|--|--|--|--|------------------------------------------------------------------------------------------------------------------------------|--|--|
|  |  |  |  | $\gamma_3$ = individuals without dysphoria: positive memories; $\gamma_4$ = individuals without dysphoria: negative memories |  |  |
|--|--|--|--|------------------------------------------------------------------------------------------------------------------------------|--|--|

827

828

| Question                                                                                                                  | Hypothesis                                                                                                                                                                                                                                                                                                             | Outcome measure                                                                                                                                 | Sampling plan (e.g. power analysis)  | Analysis Plan                                                                                                                                                                                                                                                                                                                                                                                                                                                                                                        | Interpretation given to different outcomes                                                           | Outcome                                                                                                                        |
|---------------------------------------------------------------------------------------------------------------------------|------------------------------------------------------------------------------------------------------------------------------------------------------------------------------------------------------------------------------------------------------------------------------------------------------------------------|-------------------------------------------------------------------------------------------------------------------------------------------------|--------------------------------------|----------------------------------------------------------------------------------------------------------------------------------------------------------------------------------------------------------------------------------------------------------------------------------------------------------------------------------------------------------------------------------------------------------------------------------------------------------------------------------------------------------------------|------------------------------------------------------------------------------------------------------|--------------------------------------------------------------------------------------------------------------------------------|
| <b>Test 2A – affective responses:</b><br><br><b>Which theory best explains affective memory distortions in dysphoria?</b> | <b>Hypothesis 1: Overgeneral memory bias</b><br><br>Individuals with dysphoria experience diminished positive affect when remembering positive memories and diminished negative affect when remembering negative memories, compared to individuals without dysphoria.<br>$\gamma_1 < \gamma_3$ & $\gamma_2 < \gamma_4$ | Baseline-corrected zygomaticus major activity for positive memories and baseline-corrected corrugator supercilii activity for negative memories | Similar sampling plan as for Test 1. | Similar analysis plan as for Test 1, but with the dependent variable <i>affective_response</i> instead of <i>episodic detail</i> .<br><br><i>affective_response</i> is assessed with the primary outcome variables percentage change from baseline in zygomaticus and corrugator activity for positive and negative memories, respectively.<br>Moreover, we will repeat this analysis with self-reported memory valence as complementary outcome variable.<br><br>$\gamma_1$ = individuals with dysphoria.: positive | An overgeneral memory bias best explains affective memory distortions in individuals with dysphoria. | Hypothesis 2 was confirmed.<br><br>A negativity bias best explains affective memory distortions in individuals with dysphoria. |
|                                                                                                                           | <b>Hypothesis 2: Negativity bias</b><br><br>Individuals with dysphoria experience diminished positive affect and enhanced negative affect.<br>$\gamma_1 < \gamma_3$ & $\gamma_2 > \gamma_4$                                                                                                                            |                                                                                                                                                 |                                      |                                                                                                                                                                                                                                                                                                                                                                                                                                                                                                                      | A negativity bias best explains affective memory distortions in individuals with dysphoria.          |                                                                                                                                |



|                                                                                                                                                                                                                  |                                                                                                                                                                                                                                                                                                                                                                                                                |                                                                                                                      |                                                                               |                                                                                                                                                                                                                                                                                                                                                                                                 |                                                                                                                                                                                                                                                                                                                                                       |                                                                                                                                                                   |
|------------------------------------------------------------------------------------------------------------------------------------------------------------------------------------------------------------------|----------------------------------------------------------------------------------------------------------------------------------------------------------------------------------------------------------------------------------------------------------------------------------------------------------------------------------------------------------------------------------------------------------------|----------------------------------------------------------------------------------------------------------------------|-------------------------------------------------------------------------------|-------------------------------------------------------------------------------------------------------------------------------------------------------------------------------------------------------------------------------------------------------------------------------------------------------------------------------------------------------------------------------------------------|-------------------------------------------------------------------------------------------------------------------------------------------------------------------------------------------------------------------------------------------------------------------------------------------------------------------------------------------------------|-------------------------------------------------------------------------------------------------------------------------------------------------------------------|
|                                                                                                                                                                                                                  | <p><b>Hypothesis 0:<br/>Null hypothesis</b></p> <p>Individuals with dysphoria experience normal positive affect and normal negative affect.<br/> <math>\gamma_1 = \gamma_3</math> &amp; <math>\gamma_2 = \gamma_4</math></p>                                                                                                                                                                                   |                                                                                                                      |                                                                               | <p>memories; <math>\gamma_2 =</math> individuals with dysphoria.: negative memories;<br/> <math>\gamma_3 =</math> individuals without dysphoria: positive memories; <math>\gamma_4 =</math> individuals without dysphoria: negative memories</p>                                                                                                                                                | <p>There are no differences in affective responses to autobiographical memories between individuals with and without dysphoria.</p>                                                                                                                                                                                                                   |                                                                                                                                                                   |
|                                                                                                                                                                                                                  | <p><b>Complement hypothesis:<br/>Fail safe</b></p> <p>None of the other hypotheses explains the data well.</p>                                                                                                                                                                                                                                                                                                 |                                                                                                                      |                                                                               |                                                                                                                                                                                                                                                                                                                                                                                                 | <p>None of the above hypotheses explains the data well. In this case, exploratory analyses allow us to generate hypotheses for future research.</p>                                                                                                                                                                                                   |                                                                                                                                                                   |
| <p><b>Test 2B – domain-specificity of affective responses:<br/>Are the distorted affective responses to autobiographical memories specific to memories or already present during the encoding of events?</b></p> | <p><b>In case of evidence for Test 2A – Hypothesis 1 (overgeneral memory bias):</b></p> <p><b>Test 2B – Hypothesis 1:</b><br/>Individuals with dysphoria experience diminished affective responses to positive movies and diminished affective responses to negative movies, compared to individuals without dysphoria.<br/> <math>\gamma_1 &lt; \gamma_3</math> &amp; <math>\gamma_2 &lt; \gamma_4</math></p> | <p>Zygomaticus major activity for positive movie clips and corrugator supercilii activity for negative memories.</p> | <p>The sampling plan is determined by Test 1 and Test 2A, not by Test 2B.</p> | <p>We will employ Bayesian Informative Hypothesis Testing (BAIT)<sup>63</sup>. Analyses will be conducted in three steps similar to Test 2A.</p> <p>First, we will estimate a simple multilevel model that includes the dependent variable of interest, fixed effects for the predictors of interest, and a random intercept for participant to account for the within-participants design.</p> | <p>For all potential analysis within Test 2B, the conclusions are similar.</p> <p>If there is evidence for Hypothesis 1, individuals with dysphoria show a similar pattern of distorted affective responses to novel experiences as to memories.</p> <p>If there is evidence for the complement hypothesis, the pattern of affective responses in</p> | <p>Hypothesis 1 was confirmed.</p> <p>Individuals with dysphoria show a similar pattern of distorted affective responses to novel experiences as to memories.</p> |

|  |                                                                                                                                                                                                                                                                                                                                                                                                                                                                                |  |  |                                                                                                                                                                                                                                                                                                                                                                                                                                                                                                                                                                                                                                                  |                                                                                    |  |
|--|--------------------------------------------------------------------------------------------------------------------------------------------------------------------------------------------------------------------------------------------------------------------------------------------------------------------------------------------------------------------------------------------------------------------------------------------------------------------------------|--|--|--------------------------------------------------------------------------------------------------------------------------------------------------------------------------------------------------------------------------------------------------------------------------------------------------------------------------------------------------------------------------------------------------------------------------------------------------------------------------------------------------------------------------------------------------------------------------------------------------------------------------------------------------|------------------------------------------------------------------------------------|--|
|  | <p><b>Test 2B – Complement hypothesis:</b><br/>Any other pattern of affective responses explains the data better.</p>                                                                                                                                                                                                                                                                                                                                                          |  |  | <p>This model will be the same as for Test 2A, with the exception that the primary outcome variable <i>affective_response</i> refers to percentage change from baseline of zygomaticus and corrugator activity while watching positive and negative movie clips, respectively (instead of responses to memories). Moreover, we will repeat this analysis with self-reported memory valence as complementary outcome variable.</p> <p><math>\gamma_1</math> = individuals with dysphoria: positive movies; <math>\gamma_2</math> = individuals with dysphoria: negative movies;</p> <p><math>\gamma_3</math> = individuals without dysphoria:</p> | <p>dysphoria is different than the pattern of affective responses to memories.</p> |  |
|  | <p><b>In case of evidence for Test 2A – Hypothesis 2 (negativity bias):</b></p> <p><b>Test 2B – Hypothesis 1:</b><br/>Individuals with dysphoria experience diminished affective responses to positive movies and enhanced affective responses to negative movies.<br/><math>\gamma_1 &lt; \gamma_3</math> &amp; <math>\gamma_2 &gt; \gamma_4</math></p> <p><b>Test 2B – Complement hypothesis:</b><br/>Any other pattern of affective responses explains the data better.</p> |  |  |                                                                                                                                                                                                                                                                                                                                                                                                                                                                                                                                                                                                                                                  |                                                                                    |  |

|  |                                                                                                                                                         |  |  |                                                                                                |  |  |
|--|---------------------------------------------------------------------------------------------------------------------------------------------------------|--|--|------------------------------------------------------------------------------------------------|--|--|
|  | <p><b>In case of evidence for Test 2A – Null Hypothesis or Test 2A – Complement:</b></p> <p>We will not perform Test 2B as a confirmatory analysis.</p> |  |  | <p>positive movies; <math>\gamma_4 =</math> individuals without dysphoria: negative movies</p> |  |  |
|--|---------------------------------------------------------------------------------------------------------------------------------------------------------|--|--|------------------------------------------------------------------------------------------------|--|--|

| Question                                                                                                                                                                                                                                                                                    | Hypothesis                                                                                                                                                                                                                                                                                                                      | Outcome measure                                                         | Sampling plan (e.g. power analysis)                                         | Analysis Plan                                                                                                                                                                                                                                                                                                                                                                                                                                                                                                                                                                                                                                                                                                                                                                                                                                                                                           | Interpretation given to different outcomes                                                                                                                                                                                                    | Outcome                                                                                                                                                                                            |
|---------------------------------------------------------------------------------------------------------------------------------------------------------------------------------------------------------------------------------------------------------------------------------------------|---------------------------------------------------------------------------------------------------------------------------------------------------------------------------------------------------------------------------------------------------------------------------------------------------------------------------------|-------------------------------------------------------------------------|-----------------------------------------------------------------------------|---------------------------------------------------------------------------------------------------------------------------------------------------------------------------------------------------------------------------------------------------------------------------------------------------------------------------------------------------------------------------------------------------------------------------------------------------------------------------------------------------------------------------------------------------------------------------------------------------------------------------------------------------------------------------------------------------------------------------------------------------------------------------------------------------------------------------------------------------------------------------------------------------------|-----------------------------------------------------------------------------------------------------------------------------------------------------------------------------------------------------------------------------------------------|----------------------------------------------------------------------------------------------------------------------------------------------------------------------------------------------------|
| <p><b>Test 3.1A – The relationship between episodic detail and affective responses to positive memories:</b></p> <p><b>Does the amount of retrieved episodic detail predict affective responses to a positive autobiographical memory among individuals with and without dysphoria?</b></p> | <p><b>Hypothesis 1: Positive relationship</b></p> <p>Within individuals, more episodic detail during memory retrieval predicts stronger affective responses to positive memories.</p> <p>Dysphoric group:<br/> <math>\gamma_1 &gt; 0</math><br/>                     Non-dysphoric group:<br/> <math>\gamma_2 &gt; 0</math></p> | <p>Baseline-corrected zygomaticus activity in response to memories.</p> | <p>The sampling plan is not determined by Test 3, but by Test 1 and 2A.</p> | <p>We will employ Bayesian Informative Hypothesis Testing (BAIT)<sup>63</sup>. First, we will estimate a multilevel model with the following equation (1), where the affective response to a memory of participant <math>i</math> in group <math>j</math> is:</p> $\begin{aligned} \text{affective\_response}_{ij} &= \beta_{1i}(\text{group})_{1i} + \beta_{2i}(\text{group})_{2i} \\ &+ \beta_{3i}(\text{episodic\_detail})_{ij}(\text{group})_{1i} \\ &+ \beta_{4i}(\text{episodic\_detail})_{ij}(\text{group})_{2i} \\ &+ \gamma_{1i}(\text{episodic\_detail})_{ij}^e(\text{group})_{1i} \\ &+ \gamma_{2i}(\text{episodic\_detail})_{ij}^e(\text{group})_{2i} \\ &+ \varepsilon_{ij} + U_i \end{aligned}$ <p>With:</p> $(\text{group})_{1i} = 1$ if dysphoric<br>$(\text{group})_{1i} = 0$ if non-dysphoric<br>$(\text{group})_{2i} = 0$ if dysphoric<br>$(\text{group})_{2i} = 1$ if non-dysphoric | <p>If <math>\gamma_1</math> (or <math>\gamma_2</math>) is larger than zero, positive memories that are retrieved with more episodic detail elicit stronger affective responses, within individuals with dysphoria (or without dysphoria).</p> | <p>The null hypothesis was confirmed.</p> <p>There was no relationship between episodic detail and the affective response to a positive memory, within individuals with and without dysphoria.</p> |
|                                                                                                                                                                                                                                                                                             | <p><b>Hypothesis 2: Negative relationship</b></p>                                                                                                                                                                                                                                                                               |                                                                         |                                                                             |                                                                                                                                                                                                                                                                                                                                                                                                                                                                                                                                                                                                                                                                                                                                                                                                                                                                                                         | <p>If <math>\gamma_1</math> (or <math>\gamma_2</math>) is smaller than zero, positive memories that are retrieved with more episodic detail elicit</p>                                                                                        |                                                                                                                                                                                                    |

|  |                                                                                                                                                                                                                                                                           |  |  |                                                                                                                                                                                                                                                                                                                                                                                                                                                                                                                                                                                                                                                                                                                                                                                                                                                                                                                                                                                                                                                                                                                                                                                                                                                                                                                                                                                                                                                                                                                                                                                  |                                                                                                                                                                                                                                 |  |
|--|---------------------------------------------------------------------------------------------------------------------------------------------------------------------------------------------------------------------------------------------------------------------------|--|--|----------------------------------------------------------------------------------------------------------------------------------------------------------------------------------------------------------------------------------------------------------------------------------------------------------------------------------------------------------------------------------------------------------------------------------------------------------------------------------------------------------------------------------------------------------------------------------------------------------------------------------------------------------------------------------------------------------------------------------------------------------------------------------------------------------------------------------------------------------------------------------------------------------------------------------------------------------------------------------------------------------------------------------------------------------------------------------------------------------------------------------------------------------------------------------------------------------------------------------------------------------------------------------------------------------------------------------------------------------------------------------------------------------------------------------------------------------------------------------------------------------------------------------------------------------------------------------|---------------------------------------------------------------------------------------------------------------------------------------------------------------------------------------------------------------------------------|--|
|  | <p>Within individuals, more episodic detail predicts weaker affective responses to positive memories.</p> <p>Dysphoric group:<br/> <math>\gamma_1 &lt; 0</math><br/> Non-dysphoric group:<br/> <math>\gamma_2 &lt; 0</math></p>                                           |  |  | <p><i>affective_response</i> is assessed with the primary outcome variable percentage change from baseline in zygomaticus activity (while remembering positive memories). Additionally, we will repeat this analysis with self-reported memory valence as complementary outcome measure. The factor dysphoric versus non-dysphoric is represented as (<i>group</i>). <math>\beta_{1i}</math> and <math>\beta_{2i}</math> represent the estimated <i>affective_response</i> to a memory in the dysphoric group and non-dysphoric group, respectively, if <math>(\overline{episodic\_detail})_{ij}</math> and <math>(\overline{episodic\_detail})_{ij}^c</math> are zero. <math>\beta_{3i}</math> and <math>\beta_{4i}</math> represent the linear effects of <math>(\overline{episodic\_detail})_{ij}</math> on <i>affective_response</i> in the dysphoric and non-dysphoric group, respectively. <math>\gamma_{1i}</math> and <math>\gamma_{2i}</math> represent the linear effects of <math>(\overline{episodic\_detail})_{ij}^c</math> on <i>affective_response</i> in the dysphoric and non-dysphoric group, respectively. The superscript <i>c</i> indicates that the variable <math>(\overline{episodic\_detail})</math> is participant mean-centred. <math>(\overline{episodic\_detail})</math> represents the grand-mean centred mean for each individual. The residual is indicated by <math>\epsilon_{ij}</math>. <math>U_i</math> represents a random intercept of a participant.</p> <p>The relationship between episodic detail and affective response is tested</p> | <p>weaker affective responses, within individuals with dysphoria (or without dysphoria).</p>                                                                                                                                    |  |
|  | <p><b>Null Hypothesis:<br/> No relationship</b></p> <p>Within individuals, episodic detail does not predict affective responses to positive memories.</p> <p>Dysphoric group:<br/> <math>\gamma_1 = 0</math><br/> Non-dysphoric group:<br/> <math>\gamma_2 = 0</math></p> |  |  |                                                                                                                                                                                                                                                                                                                                                                                                                                                                                                                                                                                                                                                                                                                                                                                                                                                                                                                                                                                                                                                                                                                                                                                                                                                                                                                                                                                                                                                                                                                                                                                  | <p>If <math>\gamma_1</math> (or <math>\gamma_2</math>) is zero, there is no relationship between episodic detail and the affective response to a positive memory, within individuals with dysphoria (or without dysphoria).</p> |  |

|                                                                                                                                                                                                                                                                                                     |                                                                                                                                                                                                                                                                     |                                                                         |                                                                             |                                                                                                                                                                                                                                                                                                                                                                                                                                                                                                                                          |                                                                                                                                                                                                                                                                                                                                                                                            |                                                                                                                                                                                                                                   |
|-----------------------------------------------------------------------------------------------------------------------------------------------------------------------------------------------------------------------------------------------------------------------------------------------------|---------------------------------------------------------------------------------------------------------------------------------------------------------------------------------------------------------------------------------------------------------------------|-------------------------------------------------------------------------|-----------------------------------------------------------------------------|------------------------------------------------------------------------------------------------------------------------------------------------------------------------------------------------------------------------------------------------------------------------------------------------------------------------------------------------------------------------------------------------------------------------------------------------------------------------------------------------------------------------------------------|--------------------------------------------------------------------------------------------------------------------------------------------------------------------------------------------------------------------------------------------------------------------------------------------------------------------------------------------------------------------------------------------|-----------------------------------------------------------------------------------------------------------------------------------------------------------------------------------------------------------------------------------|
|                                                                                                                                                                                                                                                                                                     |                                                                                                                                                                                                                                                                     |                                                                         |                                                                             | <p>separately for individuals with and without dysphoria.</p> <p>The hypotheses focus on the relationship of variations of episodic detail and affective responses within participants (<math>\gamma s</math>), but we will also test the relationship of episodic detail and affective responses between participants (<math>\beta s</math>).</p> <p>The dependent variable is baseline-corrected zygomaticus activity.</p>                                                                                                             |                                                                                                                                                                                                                                                                                                                                                                                            |                                                                                                                                                                                                                                   |
| <p><b>Test 3.1B – The relationship between episodic detail and affective responses to positive memories:</b></p> <p><b>Does the within-participant relationship between episodic detail and affective responses to positive memories differ between individuals with and without dysphoria?</b></p> | <p><b>Hypothesis 1: Decoupling of episodic and emotional memory components</b></p> <p>The relationship between episodic detail and affective response is smaller in the dysphoric compared to the non-dysphoric group.<br/> <math>\gamma_1 &gt; \gamma_2</math></p> | <p>Baseline-corrected zygomaticus activity in response to memories.</p> | <p>The sampling plan is not determined by Test 3, but by Test 1 and 2A.</p> | <p>We will employ Bayesian Informative Hypothesis Testing (BAIT)<sup>63</sup>. The analysis plan is exactly the same as for Test 3.1A with the exception that the <math>\gamma</math> coefficients are not compared to zero, but to each other.</p> <p>The hypotheses focus on the relationship of variations of episodic detail and affective responses within participants (<math>\gamma s</math>), but we will also test the relationship of episodic detail and affective responses between participants (<math>\beta s</math>).</p> | <p>The relationship between episodic detail and affective responses to positive memories is smaller among individuals with dysphoria compared to individuals without dysphoria. The key problem that drives distorted affective responses in dysphoria might not be a result of a failure to retrieve episodic detail, but a decoupling of episodic retrieval and affective responses.</p> | <p>The null hypothesis was confirmed.</p> <p>There was no difference between individuals with and without dysphoria in the absent relationship of affective responses and episodic detail when remembering positive memories.</p> |
|                                                                                                                                                                                                                                                                                                     | <p><b>Hypothesis 2: Enhanced coupling of episodic and emotional</b></p>                                                                                                                                                                                             |                                                                         |                                                                             | <p>The relationship between episodic detail and affective responses to positive memories is larger among</p>                                                                                                                                                                                                                                                                                                                                                                                                                             |                                                                                                                                                                                                                                                                                                                                                                                            |                                                                                                                                                                                                                                   |

|  |                                                                                                                                                                                                                 |  |  |  |                                                                                                                                                                                                                                                                                                                                                                                                              |  |
|--|-----------------------------------------------------------------------------------------------------------------------------------------------------------------------------------------------------------------|--|--|--|--------------------------------------------------------------------------------------------------------------------------------------------------------------------------------------------------------------------------------------------------------------------------------------------------------------------------------------------------------------------------------------------------------------|--|
|  | <p><b>memory components</b></p> <p>The relationship between episodic detail and affective response is larger in the dysphoric compared to the non-dysphoric group.<br/> <math>\gamma_1 &lt; \gamma_2</math></p> |  |  |  | <p>individuals with dysphoria compared to individuals without dysphoria. Enhanced coupling of episodic and emotional memory systems might contribute to the maladaptive memory distortions in dysphoria.</p>                                                                                                                                                                                                 |  |
|  | <p><b>Null Hypothesis:</b></p> <p>The relationship between episodic detail and affective response is similar in the dysphoric and the non-dysphoric group.<br/> <math>\gamma_1 = \gamma_2</math></p>            |  |  |  | <p>The relationship between episodic detail and affective responses to positive memories is similar in individuals with and without dysphoria. Distorted affective responses to autobiographical memories might be the result of a failure to retrieve memories with high episodic detail among individuals with dysphoria (as opposed to an altered coupling of episodic and emotional memory systems).</p> |  |

|                                                                                                                                                                                                                                                                                             |                                                                                                                                                                                                                                                                                                             |                                                                                    |                                                                             |                                                                                                                                                                                                                                                                                                                                                                                                                                                                                                                                                                                                                                                                                                        |                                                                                                                                                                                                                                              |                                                                                                                                                                                                    |
|---------------------------------------------------------------------------------------------------------------------------------------------------------------------------------------------------------------------------------------------------------------------------------------------|-------------------------------------------------------------------------------------------------------------------------------------------------------------------------------------------------------------------------------------------------------------------------------------------------------------|------------------------------------------------------------------------------------|-----------------------------------------------------------------------------|--------------------------------------------------------------------------------------------------------------------------------------------------------------------------------------------------------------------------------------------------------------------------------------------------------------------------------------------------------------------------------------------------------------------------------------------------------------------------------------------------------------------------------------------------------------------------------------------------------------------------------------------------------------------------------------------------------|----------------------------------------------------------------------------------------------------------------------------------------------------------------------------------------------------------------------------------------------|----------------------------------------------------------------------------------------------------------------------------------------------------------------------------------------------------|
| <p><b>Test 3.2A – The relationship between episodic detail and affective responses to negative memories:</b></p> <p><b>Does the amount of retrieved episodic detail predict affective responses to a negative autobiographical memory among individuals with and without dysphoria?</b></p> | <p><b>Hypothesis 1: Positive relationship</b></p> <p>Within individuals, more episodic detail during memory retrieval predicts stronger affective responses to negative memories.</p> <p>Dysphoric group:<br/> <math>\gamma_1 &gt; 0</math><br/> Non-dysphoric group:<br/> <math>\gamma_2 &gt; 0</math></p> | <p>Baseline-corrected corrugator supercillii activity in response to memories.</p> | <p>The sampling plan is not determined by Test 3, but by Test 1 and 2A.</p> | <p>The analysis plan for 3.2A and 3.2B is exactly the same as the analysis plan for 3.1A and 3.2B, with the exception that <i>affective_response</i> is assessed with the primary outcome variable percentage change from baseline in corrugator activity (while remembering negative memories). Additionally, we will repeat this analysis with self-reported memory valence as complementary outcome measure.</p> <p>The hypotheses focus on the relationship of variations of episodic detail and affective responses within participants (<math>\gamma</math>s), but we will also test the relationship of episodic detail and affective responses between participants (<math>\beta</math>s).</p> | <p>If <math>\gamma_1</math>(or <math>\gamma_2</math>) is larger than zero, negative memories that are retrieved with more episodic detail elicit stronger affective responses, within individuals with dysphoria (or without dysphoria).</p> | <p>The null hypothesis was confirmed.</p> <p>There was no relationship between episodic detail and the affective response to a negative memory, within individuals with and without dysphoria.</p> |
|                                                                                                                                                                                                                                                                                             | <p><b>Hypothesis 2: Negative relationship</b></p> <p>Within individuals, more episodic detail predicts weaker affective responses to negative memories.</p>                                                                                                                                                 |                                                                                    |                                                                             |                                                                                                                                                                                                                                                                                                                                                                                                                                                                                                                                                                                                                                                                                                        | <p>If <math>\gamma_1</math> (or <math>\gamma_2</math>) is smaller than zero, negative memories that are retrieved with more episodic detail elicit weaker affective responses, within individuals with dysphoria (or without dysphoria).</p> |                                                                                                                                                                                                    |



|                                                                                                                  |                                                                                                                                                                                                                                                                           |                                                                                  |                                                                             |                                                                                                                                                                                                                                                                                                                                                                           |                                                                                                                                                                                                                                 |                                                                                                                                                                                                    |
|------------------------------------------------------------------------------------------------------------------|---------------------------------------------------------------------------------------------------------------------------------------------------------------------------------------------------------------------------------------------------------------------------|----------------------------------------------------------------------------------|-----------------------------------------------------------------------------|---------------------------------------------------------------------------------------------------------------------------------------------------------------------------------------------------------------------------------------------------------------------------------------------------------------------------------------------------------------------------|---------------------------------------------------------------------------------------------------------------------------------------------------------------------------------------------------------------------------------|----------------------------------------------------------------------------------------------------------------------------------------------------------------------------------------------------|
|                                                                                                                  | <p>Dysphoric group:<br/> <math>\gamma_1 &lt; 0</math><br/> Non-dysphoric group:<br/> <math>\gamma_2 &lt; 0</math></p>                                                                                                                                                     |                                                                                  |                                                                             |                                                                                                                                                                                                                                                                                                                                                                           |                                                                                                                                                                                                                                 |                                                                                                                                                                                                    |
|                                                                                                                  | <p><b>Null Hypothesis:<br/> No relationship</b></p> <p>Within individuals, episodic detail does not predict affective responses to negative memories.</p> <p>Dysphoric group:<br/> <math>\gamma_1 = 0</math><br/> Non-dysphoric group:<br/> <math>\gamma_2 = 0</math></p> |                                                                                  |                                                                             |                                                                                                                                                                                                                                                                                                                                                                           | <p>If <math>\gamma_1</math> (or <math>\gamma_2</math>) is zero, there is no relationship between episodic detail and the affective response to a negative memory, within individuals with dysphoria (or without dysphoria).</p> |                                                                                                                                                                                                    |
| <p><b>Test 3.2B – The relationship between episodic detail and affective responses to negative memories:</b></p> | <p><b>Hypothesis 1: Decoupling of episodic and emotional memory components</b></p> <p>The relationship between</p>                                                                                                                                                        | <p>Baseline-corrected corrugator supercili activity in response to memories.</p> | <p>The sampling plan is not determined by Test 3, but by Test 1 and 2A.</p> | <p>The analysis plan for 3.2A and 3.2B is exactly the same as the analysis plan for 3.1A and 3.2B, with the exception that <i>affective_response</i> is assessed with the primary outcome variable percentage change from baseline in corrugator activity (while remembering negative memories). Additionally, we will repeat this analysis with self-reported memory</p> | <p>The relationship between episodic detail and affective responses to negative memories is smaller among individuals with dysphoria compared to individuals without dysphoria. The key problem that drives</p>                 | <p>The null hypothesis was confirmed.</p> <p>There was no difference between individuals with and without dysphoria in the absent relationship of affective responses and episodic detail when</p> |

|                                                                                                                                                                                    |                                                                                                                                                                                                                                                                           |  |  |                                                                                                                                                                                                                                                                                                                                     |                                                                                                                                                                                                                                                                                                                    |                                       |
|------------------------------------------------------------------------------------------------------------------------------------------------------------------------------------|---------------------------------------------------------------------------------------------------------------------------------------------------------------------------------------------------------------------------------------------------------------------------|--|--|-------------------------------------------------------------------------------------------------------------------------------------------------------------------------------------------------------------------------------------------------------------------------------------------------------------------------------------|--------------------------------------------------------------------------------------------------------------------------------------------------------------------------------------------------------------------------------------------------------------------------------------------------------------------|---------------------------------------|
| <p><b>Does the within-participant relationship between episodic detail and affective responses to negative memories differ between individuals with and without dysphoria?</b></p> | <p>episodic detail and affective response is smaller in the dysphoric compared to the non-dysphoric group.<br/> <math>\gamma_1 &gt; \gamma_2</math></p>                                                                                                                   |  |  | <p>valence as complementary outcome measure.</p> <p>The hypotheses focus on the relationship of variations of episodic detail and affective responses within participants (<math>\gamma</math>s), but we will also test the relationship of episodic detail and affective responses between participants (<math>\beta</math>s).</p> | <p>distorted affective responses in dysphoria might not be a result of a failure to retrieve episodic detail, but a decoupling of episodic retrieval and affective responses.</p>                                                                                                                                  | <p>remembering negative memories.</p> |
|                                                                                                                                                                                    | <p><b>Hypothesis 2: Enhanced coupling of episodic and emotional memory components</b></p> <p>The relationship between episodic detail and affective response is larger in the dysphoric compared to the non-dysphoric group.<br/> <math>\gamma_1 &lt; \gamma_2</math></p> |  |  |                                                                                                                                                                                                                                                                                                                                     | <p>The relationship between episodic detail and affective responses to negative memories is larger among individuals with dysphoria compared to individuals without dysphoria. Enhanced coupling of episodic and emotional memory systems might contribute to the maladaptive memory distortions in dysphoria.</p> |                                       |
|                                                                                                                                                                                    | <p><b>Null Hypothesis:</b></p> <p>The relationship between episodic detail and affective</p>                                                                                                                                                                              |  |  |                                                                                                                                                                                                                                                                                                                                     | <p>The relationship between episodic detail and affective responses to negative memories is similar individuals with dysphoria compared to individuals without</p>                                                                                                                                                 |                                       |

|  |                                                                                                |  |  |  |                                                                                                                                                                                                                                                                        |  |
|--|------------------------------------------------------------------------------------------------|--|--|--|------------------------------------------------------------------------------------------------------------------------------------------------------------------------------------------------------------------------------------------------------------------------|--|
|  | <p>response is similar in the dysphoric and the non-dysphoric group.</p> $\gamma_1 = \gamma_2$ |  |  |  | <p>dysphoria.. Distorted affective responses to autobiographical memories might be the result of a failure to retrieve memories with high episodic detail individuals with dysphoria (as opposed to an altered coupling of episodic and emotional memory systems).</p> |  |
|--|------------------------------------------------------------------------------------------------|--|--|--|------------------------------------------------------------------------------------------------------------------------------------------------------------------------------------------------------------------------------------------------------------------------|--|
